1 **Genetic diversity, structure, and kinship analysis of *Trachemys venusta venusta* in Wildlife**  
2 **Management Units and wild populations in south Mexico. Implications for conservation**  
3 **and management**  
4

5 Elsi B. Recino-Reyes<sup>1</sup>, Julia M. Leshner-Gordillo<sup>1\*</sup>, Salima Machkour-M'Rabet<sup>2\*</sup>, Manuel I.  
6 Gallardo-Alvárez<sup>1</sup>, Claudia E. Zenteno-Ruiz<sup>1</sup>, León D. Olivera-Gómez<sup>1</sup>, Alejandra Valdés-Marín<sup>1</sup>,  
7 Guadalupe Gómez-Carrasco<sup>1</sup>, Liliana Ríos-Rodas<sup>1</sup>, María del Rosario Barragán-Vázquez<sup>1</sup>,  
8 Raymundo Hernández Martínez<sup>1</sup>

9  
10 <sup>1</sup> Centro de Investigación para la Conservación y Aprovechamiento de los Recursos Tropicales  
11 (CICART) de la DACBiol, Universidad Juárez Autónoma de Tabasco, Villahermosa, Tabasco,  
12 México.

13 <sup>2</sup> Laboratorio de Ecología Molecular y Conservación, Departamento de Conservación de la  
14 Biodiversidad, El Colegio de la Frontera Sur, Chetumal, Quintana Roo, México.

15  
16 \* Corresponding authors

17 Julia M. Leshner-Gordillo (JMLG)

18 Email: [julialesher1@gmail.com](mailto:julialesher1@gmail.com) ; ORCID iD: 0000-0001-6943-9204

19 Salima Machkour-M'Rabet (SMM)

20 Email: [smachkou@ecosur.mx](mailto:smachkou@ecosur.mx) ; ORCID iD: 0000-0002-9505-3900

## 22 **Abstract**

23

24 The Meso-American slider turtle (*Trachemys venusta*) is a freshwater turtle endemic to Mexico  
25 and Central America. Due to the overexploitation of its natural populations, it is in the at risk  
26 category formulated by the Official Mexican Standard NOM-059-ECOL-2010. In the state of  
27 Tabasco, Management Units for the Conservation of Wildlife (UMA) were created to reduce the  
28 impact of overexploitation of freshwater turtles. However, no genetic management plan was  
29 considered. This study presents the level of genetic diversity of the founder individuals in order to  
30 develop a management plan which will optimize reproduction in the UMA. Genetic diversity was  
31 compared between captive (n = 45) and wild (n = 86) individuals using 14 microsatellite molecular  
32 markers. Level of genetic diversity could be considered as low ( $H_e < 0.6$ ) for a species of turtle and  
33 suggests that a higher level of protection is required for this particular species. Furthermore, values  
34 were slightly higher for the captive group reflecting the mix of genetic sources (founding  
35 individuals from different localities) and demonstrating that the captive population is genetically  
36 representative of natural populations. The genetic structure analysis revealed a relationship  
37 between captive and wild populations, indicating the influence of the two principal river basins in  
38 this region on the population of freshwater turtles. Finally, according to the results obtained from  
39 the analysis conducted using STORM and ML-RELATE programs, we recommend the use of 19  
40 females and 13 males, generating a potential of 247 dyads with no relationship. These first results  
41 of genetic management in a Mexican UMA, demonstrate the importance of molecular approaches  
42 at the time of managing and conserving species in captivity.

43

## 45 **Introduction**

46

47 Currently, the world faces a higher and more rapid loss of its biodiversity [1], predominantly due  
48 to anthropogenic activities leading to climate change, habitat loss, introduction of invasive species,  
49 pollution, habitat degradation among others; consequently, captive breeding programs are a priority  
50 for species conservation [2]. During the last few decades, there has been an increase in global  
51 awareness on the need to conserve species through the management of captive populations and  
52 develop integrative conservation and management strategies [3-4]. Accordingly, the World  
53 Association for Zoos and Aquariums promotes the increase of animal management programs at  
54 population level to establish viable populations recognizing that this represents a biological and  
55 organizational challenge [3]. In addition, other initiatives are emerging such as the Community-  
56 Based Natural Resources Management that began in Africa and promoted the integration of the  
57 complex relationships among society (e.g., local livelihoods), economic and political authorities,  
58 environment, and sustainability principles for the management of natural resources [4]. In Mexico,  
59 the initiative of environmental policy started in 1997 with the creation of the National Program for  
60 Wildlife Conservation and Productive Diversification of the Rural Sector in which one of the axes  
61 is the development of the System of Management Units for Wildlife Conservation (SUMA, by its  
62 Spanish acronym) created by the Ministry of Environment and Natural Resources (SEMARNAT,  
63 by its Spanish acronym) [4-5]. Through this program, many Wildlife Management Units (UMAs,  
64 by its Spanish acronym) have been created [5-6]. The goal of UMAs is to provide an adequate and  
65 economically viable management of wildlife resources (fauna and flora) for conservation, rescue,  
66 and preservation purposes [7]. UMAs incorporate a wide range of activities such as research,  
67 recreation, environmental education, game farms, and commercialization of wildlife by products

68 which are subject to regulated laws [6]. Furthermore, the creation of UMAs has favored the  
69 development of biological corridors where UMAs are interconnected with protected natural areas,  
70 as well as areas where sustainable use of the species is carried out, thus contributing to the  
71 improvement of biodiversity conservation [8]. Unfortunately, genetic aspects linked to captive  
72 breeding are rarely considered in the management of an UMA, which may lead to the failure of  
73 these programs.

74  
75 One of the principal objectives of captive breeding programs is to obtain and maintain a population  
76 with a high level of genetic variation [9]. Generally, captive populations are small and established  
77 with few founders' individuals, making these populations prone to high genetic damages such as a  
78 loss of genetic diversity, inbreeding depression, accumulation of novel deleterious mutations, and  
79 genetic adaptation to captivity [10]. However, from the few investigations conducted in UMAs,  
80 the genetic considerations (e.g., the genetic diversity of founders and relations of kinship) are one  
81 of the least considered aspects when establishing and managing an UMA. In Mexico, studies using  
82 genetic tools to improve the management of captive populations of UMA are scarce. Zarza et al.  
83 [11] identified the origin of 24 individuals of *Ctenosaura pectinata* Wiegmann 1834 (Squamata,  
84 Iguanidae), a threatened Mexican endemic spiny-tailed iguana, bred in two Mexican UMAs. The  
85 study was conducted using mtDNA and microsatellites molecular markers as well as genetic  
86 assignment methods, with the aim of comparing these individuals with a database of 341  
87 individuals from 49 localities. This type of research demonstrates the importance of genetic tools  
88 in identifying the origin of individuals before a possible release in the wild.

89  
90 Slider turtles of the genus *Trachemys* Agassiz, 1857 (Testudines, Emydidae) are freshwater turtles  
91 that present a wide distribution throughout the New World with 26 recognized extant forms [12].

92 In Mexico, a total of 13 subspecies are recognized, belonging to a variable number of species, from  
93 between one and nine, depending on the author concerned and partially dependent on the species  
94 concept used to identify lineages (review in [13]). One widely distributed *Trachemys* species, is *T.*  
95 *venusta* (Gray, 1856) with populations present from the Atlantic river basins of Mexico (and an  
96 isolated population in Acapulco) to Central America follow the most recent genetic analysis [13].  
97 Its nomenclature is still a bit uncertain, therefore, genetic studies have been conducted in order to  
98 obtain a clearer understanding of its classification [14-16]. Three subspecies are described for *T.*  
99 *venusta* [17], all found in Mexico: *T. venusta venusta* (Gray, 1856), *T. venusta cataspila* (Günther,  
100 1885), and *T. venusta grayi* which based on a genetic analysis, was recently proposed as a full  
101 species *T. grayi* (Bocourt, 1868) [15]. In the state of Tabasco only one subspecies was reported, *T.*  
102 *venusta venusta* [13, 17], commonly called *hicotea*.

103  
104 The *hicotea* has been very important for the culture and gastronomy of the Maya people since the  
105 prehispanic period [18]. One of the few studies that deal with the exploitation of turtles in the state  
106 of Tabasco shows that the ingrained consumption of turtles persists despite the fact that the species  
107 is considered endangered [18]. Turtles are still in demand for commercial and consumption  
108 purposes. In addition to this culinary practice, urban growth has increased markedly since the mid-  
109 20<sup>th</sup> century leading to high rates of deforestation [19-20]. The city of Villahermosa, the largest  
110 urban area in the state of Tabasco, is a perfect example of such environmental degradation; over a  
111 period of only 40 years, 4,008 ha of forest vegetation and 289 ha of wetlands have been lost [20].  
112 The uncontrolled exploitation of freshwater turtles in Mexico, particularly in Tabasco, together  
113 with habitat loss, has resulted in many species of turtles being placed in the endangered category  
114 in the Official Mexican Standard (Norma Oficial Mexicana), the NOM-059-SEMARNAT-2010.  
115 This regulation establishes the protection of the environment and native species of wild flora and

116 fauna of Mexico considering the following categories: endangered, threatened, under special  
117 protection, and probably extinct in the wild. *Trachemys venusta* (previously known as *T. scripta*  
118 *venusta* [21] is classified as “under special protection” [22].

119  
120 Molecular tools allow us identify the origin of individuals when unknown (confiscated pets, illegal  
121 seizure) and to infer kin relationships among captive founder individuals [2]. For an adequate  
122 management of the breeding program, the knowledge of the relatedness between individuals is  
123 fundamental for success, because it allows a minimization of mean kinship and retains the  
124 maximum of genetic variation (review in [2]). Two different ways could be used to evaluate kin  
125 relationships: (1) the relatedness ( $r$ ) which is a measure of the fraction of identical alleles shared  
126 by offspring, and (2) the relationship category which is a particular pedigree (genealogical)  
127 relationship such as full siblings or half siblings [23].

128  
129 In this study, the genetic aspects of the founder individuals of *T. venusta venusta* from one UMA  
130 of the state of Tabasco were characterized and compared to a wild population, with the purpose of  
131 establishing an efficient management plan for reproduction. Ensuring mating between unrelated  
132 individuals and maintaining an adequate genetic variability in the individuals produced at the UMA  
133 will optimize a reintroduction program. Considering this, our particular objectives were (1) to  
134 determine the genetic diversity level of founder individuals of *Trachemys venusta venusta* in a  
135 UMA and compare it with wild individuals, (2) to evaluate intra- and inter- genetic structure of the  
136 UMA and wild population, (3) to determine kin relationships (relatedness and pedigree) between  
137 males and females in the UMA, and finally (4) our results will be discussed from a management  
138 and conservation perspective.

139

## 140 **Materials and methods**

141

## 142 **Ethics Statement**

143

144 Permission to collect specimens of *Trachemys venusta* was provided by the Mexican Ministry of  
145 Environment and Natural Resources (SEMARNAT). Experimental protocol was approved by  
146 Ethical Committee from the “Universidad Juarez Autonoma de Tabasco”, Mexico.

147

## 148 **Sampling sites and collection**

149

150 The samples used for this study were obtained from one Wildlife Management Unit (UMA) and  
151 from three different wild localities (Fig 1). All samples were collected manually during 2017 and  
152 2018 or using Fyke nets [24]. All wild turtles are between three to 10 years old according to their  
153 morphometric measures [25].

154

155 **Fig 1. Study area in south Mexico.** Squares represent location of the captive group (UMA) and  
156 the three localities for wild individuals (Miguel Hidalgo, Bosques de Saloya, and La Venta Park  
157 Museum) with their respective number of samples (n). The black points (Pomposu and El Espino)  
158 represent the localities of origin of founder’s individuals of captive groups (UMA) (photo by Julia  
159 M. Leshner-Gordillo).

160

161 The UMA is located in the state of Tabasco (municipality of Nacajuca; 18°11'23''N -  
162 92°59'37''W) and it was created in 1978. It is dedicated to the reproduction of seven freshwater  
163 turtles *Dermatemys mawii* Gray, 1947 (Testudines, Dermatemydidae), *Chelydra serpentina* L.,  
164 1758 (Testudines, Chelytridae), *Staurotypus triporcatus* Wiegmann, 1828 (Testudines,  
165 Kinosternidae), *Trachemys venusta venusta*, *Rhinoclemys aerolata* Duméril & Duméril, 1851  
166 (Testudines, Geoemydidae), *Claudius angustatus* Cope, 1865 (Testudines, Kinosternidae),  
167 *Kinosternon leucostomum* Duméril & Duméril, 1851 (Testudines, Kinosternidae) for conservation  
168 purposes and to exchange individuals with other turtle farms. We obtained all initial founder  
169 individuals from the UMA (n = 86; n<sub>female</sub> = 73 and n<sub>male</sub> = 13). In 2008, this UMA reported 1650  
170 newborn individuals of *T. venusta*, and the total number of individuals of this species was 4125  
171 [26]. Furthermore, we obtained a total of 45 wild individuals (n<sub>female</sub> = 32 and n<sub>male</sub> = 13) from (1)  
172 La Venta Park Museum located in Tabasco state (municipality of Centro; 18°00'02''N -  
173 92°56'08''W, n = 29), (2) Miguel Hidalgo (municipality of Centla; 18°20'00''N-92°30'00''W, n  
174 = 4), and (3) Bosques de Saloya (municipality of Nacajuca, 18°11'22.85'' N – 92°58'39.37'' W, n  
175 = 12). Those individuals were considered as wild because they have been directly collected from a  
176 natural environment (e.g., Miguel Hidalgo and Bosques de Saloya), or because they have been  
177 recently rescued from the wild and donated directly to a center/farm (e.g., La Venta Park). Because  
178 some wild localities have a low number of samples, all the 45 wild individuals were pooled and  
179 analyzed as a single wild population.

180  
181 Tissue samples were collected by small skin cuts (1 cm<sup>2</sup>) from the interdigital webbing. Before  
182 sampling, we disinfected the skin with 70% ethanol, subsequently we applied an antiseptic  
183 (methylthioninium chloride) on the wound to avoid infection. The collected samples were



184 preserved in a tissue buffer solution (salt-saturated 20% DMSO; [27]), and stored at -80°C until  
185 DNA extraction.

186

## 187 **DNA extraction and microsatellite amplification**

188

189 DNA was extracted using the DNeasy Blood and Tissue kit (QIAGEN); quality and concentration  
190 were verified using a UV-Vis spectrophotometer (Thermo Scientific NanoDrop One). We used a  
191 total of 14 microsatellite primers described as polymorphic for the genus *Trachemys* [28], one of  
192 them (TSC-108) was designed for this study using Primer3 software [29]. DNA amplification was  
193 performed at a final volume of 20µl per reaction, which contained: 20 ng of DNA, 2 µl of ultrapure  
194 water (INVITROGEN), 100 µM of forward primer, 100 µM of reverse primer, 15 µl of  
195 HotStarTaq® Master Mix Kit (QUIAGEN) (5 units/µl of polymerase, 20mM of TRIS-Cl, 100mM  
196 of KCl, 0.1mM EDTA and 400 µM of dNTPs). The amplifications were carried out in a Bio-Rad  
197 T100 thermocycler with the following conditions: 94°C for 7 min, followed by 45 cycles composed  
198 by denaturation at 92°C for 1 min, primer annealing temperature of 54°C or 55°C follow primers  
199 for 1 min, an extension at 72°C for 1 min, and a final extension at 72°C for 7 min. Horizontal  
200 electrophoresis was performed to visualize the PCR products using high definition agarose gels  
201 (agarose 1000, INVITROGEN) at a concentration of 3.4%. Gels were digitalized in a UV  
202 transilluminator Bio-print CX4 (VILBER LOUMAR) and it was interpreted using the BioVision  
203 software (VILBER LOUMAR). Microsatellites reproducibility was tested considering the allelic  
204 dropout (when a heterozygote is typed as a homozygote; [30]) and false allele (when homozygote  
205 is typed as a heterozygote; [30]) rates using GIMLET 1.3.3 [30]. The criteria used to test the  
206 genotyping error were: (1) analysis based on 5% of samples (eight individuals chosen at random)

207 from the total sample size as suggested by Bonin et al. [31], (2) the same DNA extract was used in  
208 the reproducibility test and experiments, and (3) each DNA sample was replicated three times  
209 (twice in the same PCR run and once in the other PCR run) [32].

210

## 211 **Data analysis**

212

### 213 Genetic diversity

214

215 Genetic diversity was estimated considering two groups, UMA and wild population, through the  
216 number of alleles ( $N_A$ ), effective number of alleles ( $N_e$ ), observed heterozygosity ( $H_o$ ), and expected  
217 heterozygosity ( $H_e$ ) using GENALEX 6.502 [33]. To test for differences in these parameters between  
218 the UMA and wild population, a Mann-Whitney  $U$  test was performed using PAST 3.21 [34].  
219 Because allelic richness ( $N_A$ ), as in other measures, does not consider the sample size, we  
220 determined the allelic richness ( $AR$ ) following the rarefaction method implemented in HP-RARE  
221 1.0 [35-36] which takes into account the difference in sample size. Additionally, the index of the  
222 polymorphic content ( $PIC$ ) was determined using CERVUS 3.0.7 [37]. Levels of inbreeding were  
223 estimated using three different parameters: at the population level we determined (1) the inbreeding  
224 coefficient ( $F$ ) using GENALEX 6.502, at the individual level we determined (2) the internal  
225 relatedness ( $IR$ ) which evaluates the relatedness of the parents of an individual [38] (outbred  
226 individuals present values equal to or below zero, and positive values indicate some relatedness of  
227 parents with a maximum value of 1), and (3) the homozygosity by loci ( $HL$ ) which is a  
228 homozygosity index that weights the contribution of each locus depending on their allelic  
229 variability [39], their values range from 0 (all loci are heterozygous) to 1 (all loci are homozygous).

230 The Hardy-Weinberg equilibrium (*HWE*) for heterozygote deficit was tested with GENEPOP 4.0.10  
231 [40-41], and the presence of null alleles at each loci was estimated with FREENA [42]. Finally, we  
232 evaluated the effective population size ( $N_E$ ) using NEESTIMATOR 2.1 [43] considering the linkage  
233 disequilibrium method with the lowest allele frequency at a critical level of 0.05, and the jackknife  
234 method to evaluate the 95% of confident interval (CIs) as recommended [44].

235  
236 To test a possible bottleneck event, we compared the levels of  $H_e$  excess related to the expected  
237 equilibrium heterozygosity ( $H_{eq}$ ) using BOTTLENECK 1.2.02 [45-46]. Two models of mutational  
238 equilibrium were considered: a mutational stage model (SMM) and a two-phase model (TPM),  
239 with 95% of the mutation assumed in a single step for the TPM model and a variance among  
240 multiple steps of 12 as recommended [46]. Significance was evaluated from the one-tailed  
241 Wilcoxon rank test which is more appropriate and powerful for less than 20 microsatellites [46].  
242 Bottleneck event will be considered only if both models (SMM and TPM) are significant.

243

## 244 Genetic structure

245

246 To determine the level of genetic differentiation between the UMA and the wild population, the  
247 values of  $F_{ST}$  was estimated with GENALEX 6.502. To identify the genetic structure between the  
248 UMA and the wild population, the Bayesian analysis implemented in STRUCTURE 2.3.1 [47] was  
249 applied. This method allows to determine the optimal number of groups/clusters ( $K$ ) and assign to  
250 each individual a membership probability ( $q_i$ ) to new clusters. The admixture and allele correlated  
251 frequency models were used. To determine the optimal number of clusters, the program was  
252 executed ten times for different numbers of  $K$  ( $K$  from 1 to 5), and for each run the Markov Chain

253 Monte Carlo (MCMC) algorithm was executed with a burn-in period of 100,000 steps followed by  
254 100,000 steps. We used the Evanno method ( $\Delta K$  method; [48]), implemented in the STRUCTURE  
255 HARVESTER website [49] to determine the best value of  $K$  that fit with our data. Because this  
256 method assigns individuals by force to the number of clusters considered at optimal, we decided to  
257 conduct a principal coordinate analysis (PCoA) to investigate genetic structure without a priori  
258 assignment. Finally, a hierarchical analysis of molecular variance (AMOVA; 9,999 permutations)  
259 was processed considering region level (UMA vs wild populations) and population level (different  
260 wild localities) using allelic distance matrix as input. Those ultimate analyses (PCoA and  
261 AMOVA) were conducted using GENALEX 6.502.

262

## 263 Kinship analysis

264

265 To evaluate pedigree relationships in the UMA, we used the ML-RELATE program [37] which  
266 calculates the likelihood of each kind of relationship for each pair of individuals considering the  
267 following pedigree relationships: unrelated (U), half-siblings (HS), full-siblings (FS), and parents-  
268 offspring (PO). For each pair of individuals, the program provides by default, the highest  
269 likelihood, then suggests the highest relationship. ML-RELATE provides a list of several possible  
270 relationships (the putative corresponding to the highest likelihood, and the alternatives) for each  
271 individual pair based on a test (statistical test and simulations) that determined which relations are  
272 consistent with the data (confidence set option; 0.05 level of significance and 1,000 simulations)  
273 [37]. Based on those relationships for each female-male pair from the UMA, we used a likelihood  
274 ratio test (1,000 simulations; specific hypotheses test option) to obtain a  $P$  value: if  $P$  is small ( $P <$   
275 0.05) the alternative hypothesis is rejected, thus we maintained the highest relationship proposed

276 by the highest likelihood, and if  $P$  value is large ( $P > 0.05$ ), putative and alternative relationships  
277 are consistent with the data, therefore, we selected the lowest relationship (U < HS < FS < PO)  
278 [37].

279  
280 Furthermore, relatedness coefficient ( $r$ ) among each female-male pair in the UMA was evaluated  
281 using STORM [50] and ML-RELATE programs.

282

## 283 **Results**

284

### 285 **Genetic diversity**

286

287 A total of 86 individuals from the UMA and 45 from the wild population were successfully  
288 amplified with 14 microsatellite loci. However, considering that four loci were identified as  
289 possible null alleles (Table 1), we decided to eliminate them and make the following analysis only  
290 considering the 10 loci without null alleles. Genotyping error rates could be considered null  
291 (average allelic dropout rate of 0% and average false allele rate of 0%; because the errors were not  
292 significant) when compared with other studies (see Table 4 in [51]).

293

294 **Table 1. Characteristics of the 14 microsatellites used for *Trachemys venusta venusta* in south Mexico over the whole dataset.**

295

| Locus               | Primers (5'→3')                                     | Repeat motif         | Ta (°C) | Size range (bp) | N <sub>a</sub> | NA <sub>Freq</sub> | H <sub>o</sub> | H <sub>e</sub> |
|---------------------|-----------------------------------------------------|----------------------|---------|-----------------|----------------|--------------------|----------------|----------------|
| TSC108 <sup>a</sup> | F:CGCAGTCAAACACCTTCAG<br>R:TTCACCTCCCCAGATCTCAC     | (TAGA) <sub>8</sub>  | 55      | 203-263         | 5              | 0.048              | 0.023          | 0.034          |
| TSC169 <sup>a</sup> | F:TAAAATGGGCCTCAACAAGG<br>R:GGATTGTTTGGTCAAAGAAGTTG | (TAGA) <sub>10</sub> | 55      | 210-250         | 4              | <b>0.158</b>       | 0.313          | 0.500          |
| TSC241 <sup>a</sup> | F:GGTTTTTCTCCATCCCGAAT<br>R:TTCATTTTGAAAGGTTAGCTCGT | (TATC) <sub>7</sub>  | 55      | 193-213         | 5              | <b>0.231</b>       | 0.326          | 0.684          |
| TSC243 <sup>a</sup> | F:GCAAAACCTGGAGATTTTCAA<br>R:TTTCGATGGAAAATGGCTTT   | (ATAG) <sub>20</sub> | 55      | 92-168          | 7              | 0.087              | 0.788          | 0.815          |
| TSC252 <sup>a</sup> | F:CCATACACCCTCTGACAGCA<br>R:TTCCCAAGACAAGAAACACCTT  | (ATAG) <sub>8</sub>  | 55      | 190-238         | 5              | 0.098              | 0.500          | 0.695          |
| TSC260 <sup>a</sup> | F:TGCAAATGGAGTTGCAAGA<br>R:TCCATTTGAACCTGGGAGAA     | (ATCT) <sub>16</sub> | 55      | 150-214         | 6              | 0.034              | 0.686          | 0.725          |
| TSC263 <sup>a</sup> | F:TGTGCACGGGAGTTGTATG<br>R:TTCTATTTGCCAAAATTGCAT    | (GATA) <sub>10</sub> | 55      | 111-173         | 11             | 0.122              | 0.797          | 0.842          |
| TSC288 <sup>a</sup> | F:ACAAGATTGGCACCCACTTC<br>R:AGTATGGGGATGCATGTGTG    | (TG) <sub>10</sub>   | 55      | 150-184         | 6              | <b>0.267</b>       | 0.429          | 0.778          |

|                             |                                                           |                      |    |         |    |              |       |       |
|-----------------------------|-----------------------------------------------------------|----------------------|----|---------|----|--------------|-------|-------|
| <b>TSC299</b> <sup>a</sup>  | F:CCATGTGCCATCTGTCTACCT<br>R:GATCAAGGGATGAGGGTCAA         | (TATC) <sub>17</sub> | 55 | 236-300 | 12 | <b>0.153</b> | 0.884 | 0.906 |
| <b>TSC302</b> <sup>a</sup>  | F:ACTGGCCAGCAGGAGTAATG<br>R:TGGGGCACAACACTACTAGGG         | (TAGA) <sub>7</sub>  | 55 | 161-201 | 7  | 0.004        | 0.791 | 0.733 |
| <b>TSC323</b> <sup>a</sup>  | F:TGTAAAATTGATTAGGACCTCTCTGA<br>R:TGCAATCTATCACATGACTGCAT | (TATC) <sub>14</sub> | 54 | 201-237 | 7  | 0.132        | 0.643 | 0.767 |
| <b>TSC328</b> <sup>a</sup>  | F:TGGATTGCATTATTAGAAATGGT<br>R:CCCACCAACCACCATAATTC       | (TAGA) <sub>11</sub> | 54 | 179-243 | 4  | 0.137        | 0.291 | 0.533 |
| <b>TSC330</b> <sup>a</sup>  | F:TGGCTTATTTTGCAGCCTGA<br>R:CCAACCTTCACTCCCATTGC          | (ATCT) <sub>13</sub> | 55 | 216-270 | 7  | 0.124        | 0.780 | 0.830 |
| <b>TSC-108</b> <sup>b</sup> | F:AATTCATTTGCCTTGAGAAA<br>R:GTCGTCGATTTGGTTAAAAG          | (GATA) <sub>8</sub>  | 55 | 189     | 4  | 0.057        | 0.094 | 0.090 |

296 Annealing temperature ( $T_a$ ), number of alleles ( $N_a$ ), estimate null allele frequency ( $NA_{freq}$ ), observed heterozygosity ( $H_o$ ), expected  
297 heterozygosity ( $H_e$ ). Bold values of  $NA_{freq}$  represent microsatellites with high probability of the presence of a null allele ( $NA_{freq} > 0.15$ ;  
298 [52]). Primers from Simison et al. [28] (a), primer designed for this study (b).

299

300 Globally, genetic diversity parameters ( $N_a$ ,  $N_e$ ,  $H_o$ ,  $H_e$ ,  $PIC$ ) were slightly higher for the UMA than  
301 for the wild population but never significant (Table 2). The allelic richness ( $AR$ ) was very similar  
302 between both groups (UMA and wild populations), and this value that considers sample size does  
303 not differ from the value for the number of alleles (Table 2). The effective population size ( $N_E$ ) was  
304 low, with a value of 91 for the UMA and 110 for wild populations. The inbreeding coefficients ( $F$ )  
305 were positive for both groups but with a lower value for the UMA than for the wild population,  
306 and the HWE test for deficiency of heterozygotes was only highly significant for the wild  
307 population (Table 2). At the individual level, internal relatedness ( $IR$ ) was very low for the UMA  
308 and high for the wild population with high individual variability for both groups (S1 Fig). The level  
309 of homozygosity ( $HL$ ) was high for the UMA (an average of 33% of loci are homozygous per  
310 individual) and very high for the wild population (an average of 55% of loci are homozygous per  
311 individual) (Table 2), and even if some individual variability could be observed (S2 Fig) wild  
312 individuals clearly show a tendency to a high value of  $HL$ . No recent bottleneck was detected for  
313 any population as suggested by the L-shape graph (Fig 2) that shows a characteristic L-shape  
314 distribution (alleles with low frequency are the most numerous), and by both heterozygote excess  
315 tests (SMM and TPM) (Table 2).

316

317 **Fig 2. L-shaped distribution graph for detecting bottleneck considering the ten**  
318 **microsatellites for *Trachemys venusta venusta*. UMA (purple) and wild populations (blue).**

319

320 **Table 2. Statistical summary for *Trachemys venusta venusta* in south Mexico using ten**  
321 **polymorphic microsatellites for founder individuals of the UMA and for wild population.**

322



| Analysis                 | Parameters            | Populations          |                     | Test |
|--------------------------|-----------------------|----------------------|---------------------|------|
|                          |                       | UMA                  | Wild                |      |
|                          | $N$                   | 86                   | 45                  |      |
|                          | $N_E$                 | 91.2                 | 110.3               |      |
|                          | 95% CIs               | 43.6 - 408.9         | 41.2 - infinite     |      |
| <b>Genetic diversity</b> | $N_a$                 | 5.900                | 5.400               | ns   |
|                          | $AR$                  | 5.310                | 5.110               |      |
|                          | $N_e$                 | 3.684                | 3.344               | ns   |
|                          | $H_o$                 | 0.539                | 0.386               | ns   |
|                          | $H_e$                 | 0.606                | 0.594               | ns   |
|                          | $PIC$                 | 0.578                | 0.565               |      |
| <b>Inbreeding</b>        | $F$                   | 0.129                | 0.317               |      |
|                          | HWE                   | ns                   | ***                 |      |
|                          | $IR (\pm \text{std})$ | 0.021 ( $\pm$ 0.448) | 0.277 ( $\pm$ 0.36) |      |
|                          | $HL (\pm \text{std})$ | 0.337 ( $\pm$ 0.162) | 0.549 ( $\pm$ 0.17) |      |
| <b>Bottleneck</b>        | W test – TPM          | 0.187                | 0.422               |      |
|                          | W test – SMM          | 0.384                | 0.500               |      |

323 Number of individuals ( $N$ ), effective population size ( $N_E$ ), jackknife confidence interval (95% CIs),  
324 mean number of allele ( $N_a$ ), allelic richness ( $AR$ ) using rarefaction method, effective number of  
325 alleles ( $N_e$ ), polymorphic information content ( $PIC$ ), observed heterozygosity ( $H_o$ ), expected  
326 heterozygosity ( $H_e$ ), inbreeding coefficient ( $F$ ), Hardy-Weinberg equilibrium (HWE) with \*\*\* for  
327  $P < 0.001$ , individual relatedness ( $IR$ ), homozygosity by loci ( $HL$ ), standard deviation (std), results  
328 of the Wilcoxon test for two mutational models: two-phase mutation model (W test - TPM) and

329 stepwise mutation model (W test - SMM), finally results for the Mann-Whitney  $U$  test (Test): not  
330 significant (ns).

331

## 332 **Genetic structure**

333

334 The  $F_{ST}$  value between UMA and wild population was low (0.031) but significant ( $P = 0.0001$ ),  
335 just as the results of AMOVA at the region level presented only 2% of variance ( $P = 0.0017$ ) and  
336 4% for populations level ( $P = 0.001$ ), the rest of the variance corresponded to the individual  
337 variance (see details of analysis in S1 Table). The Bayesian analysis performed by the STRUCTURE  
338 program identified an optimal number of groups at  $K = 2$  using the  $\Delta K$  method (S3 Fig). All  
339 individuals were relatively well partitioned into the two new clusters according to their  $Q$   
340 probabilities (Table 3), showing a good separation between individuals from the UMA group  
341 (purple in Fig 3) and individuals from the wild population (blue in Fig 3). Nevertheless, some  
342 individuals of the UMA present a genetic profile characteristic of a wild population. A subsequent  
343 STRUCTURE analysis for each new cluster did not permit the identification of a sub-structure (not  
344 shown). As observed for Bayesian analysis, PCoA analysis showed a relatively good separation  
345 between UMA (purple in Fig 4) and wild individuals (blue in Fig 4). Individuals from the La Venta  
346 locality (blue triangle) are more separated than others (blue circle and square).

347

348 **Fig 3. Bayesian analysis computed by STRUCTURE 2.3.3 software using  $K = 2$  for *Trachemys***  
349 ***venusta venusta*.** Each individual is represented by a vertical line fragmented into  $k$  segments of  
350 length proportional to the estimated membership probability ( $q_i$ ) in the two new clusters. Cluster 1  
351 characteristic of captive group (UMA; purple) and cluster 2 characteristic of wild individuals (bleu)

352 with details of different localities: Bosques de Saloya (B.S), Venta Park Museum (V.P.M), and  
353 Miguel Hidalgo (M.H).

354  
355 **Fig 4. Principal coordinate analysis (PCoA) for *Trachemys venusta venusta* based on ten**  
356 **microsatellites.** Individuals from Wildlife Management Unit (UMA; purple circle), and wild  
357 individuals (blue), localities: La Venta (triangle), Miguel Hidalgo (circle), and Bosques de Saloya  
358 (square).

359  
360 **Table 3. Probability  $Q$  of membership of individuals in each initial group to each of the**  
361 **inferred clusters determined by STRUCTURE 2.3.1 program.**

362

| Initial group   | Inferred clusters |              |
|-----------------|-------------------|--------------|
|                 | 1                 | 2            |
| UMA             | <b>0.680</b>      | 0.320        |
| Wild population | 0.139             | <b>0.861</b> |

363 The dominant percentage of a group that is assigned to one cluster is indicated in bold.

364

### 365 **Kinship analysis in UMA**

366  
367 Relatedness coefficient ( $r$ ) determined using STORM and ML-RELATE clearly shows some kinship  
368 relations in the initial founders of the UMA. STORM and ML-RELATE analysis presents values from  
369 -4.78 to 0.67 and from 0 to 0.63 respectively, considering all kind of dyads (female x female, male  
370 x male, and female x male). However, considering that we are interested in genetic management to  
371 optimize reproduction, we focused our analysis on female x male pairs only, which represent a

372 total of 949 dyads. Using the relatedness coefficient generated by STORM we determined the  
373 proportion of each pedigree relation (PO, FS, HS, and U) based on the follow criteria: values  $\leq 0$   
374 are assimilated to unrelated (U), values  $\leq 0.25$  are assimilated to half-sibling (HS), and values  $>$   
375  $0.25$  are assimilated to FS or PO without distinction [53-54]. We obtained 45% of unrelated ( $n =$   
376  $427$ ), 39% of HS ( $n = 367$ ), and 16% of FS or PO ( $n = 155$ ). Those pedigree predictions differed  
377 considerably from ML-RELATE relationships, based on the highest likelihood which give us 79.7%  
378 of U, 15.4% of HS, 3.8% of FS, and 1.2% of PO for the same dataset (a total of 193 pairs of  
379 individuals presented half-sibling or greater kinship relation). Relatedness coefficients  
380 corresponding to those pedigree predictions were highly variable (Fig 5, full color histogram) with  
381 a mean of 0.039 ( $\pm 0.067$ SD, min = 0.000, max = 0.474) for U (blue in Fig 5), 0.230 ( $\pm 0.068$ SD,  
382 min = 0.087, max = 0.388) for HS (yellow in Fig 5), 0.383 ( $\pm 0.083$ SD, min = 0.230, max = 0.625)  
383 for FS (green in Fig 5), and 0.536 ( $\pm 0.046$ SD, min = 0.500, max = 0.611) for PO (red in Fig 5).  
384 When the likelihood ratio test was applied to compare the putative relationship (highest value of  
385 likelihood) with the alternative ones proposed by the confidence interval, we obtained: 91.0% of  
386 U, 7.5% of HS, 1.4% of FS, and 0.1% of PO for the same dataset (a total of 85 pairs of individuals  
387 presented half-sibling or greater kinship relation), also with a highly variable relatedness  
388 coefficient (Fig 5, hatched color histogram) with a mean of 0.060 ( $\pm 0.085$ SD, min = 0.000, max  
389 = 0.500) for U (blue in Fig 5), 0.342 ( $\pm 0.067$ SD, min = 0.228, max = 0.511) for HS (yellow in Fig  
390 5), 0.509 ( $\pm 0.099$ SD, min = 0.340, max = 0.625) for FS (green in Fig 5), and for PO only one data  
391 (red in Fig 5).

392  
393 **Fig 5. Distribution of cumulative frequencies of relatedness coefficient ( $r$ ) determined by ML-**  
394 **RELATED for female x male dyads of *Trachemys venusta venusta* in the UMA.** Estimation based  
395 on the highest likelihood (full color) and the estimation obtained after the likelihood ratio test

396 (hatched color). Four relationships were considered: unrelated (blue), half-sibling (yellow), full-  
397 sibling (green), and parent-offspring (red). Numbers inside each bar of the histogram correspond  
398 to the number of pairs observed in this category.

399  
400 To optimize reproduction with the best females and males in terms of kinship relation, we analyzed  
401 all female x male dyads (total of 949) and identified which pairs presented half-sibling or greater  
402 kinship relation. In the first instance, we considered kinship relation based on the highest likelihood  
403 prediction (letters of kinship relation type in bold in Table 4) and subsequently, we looked at which  
404 of these relationship could be changed to unrelated considering the likelihood ratio test results  
405 (letters of kinship relation type in grey in Table 4). From 73 female founders of the UMA, only 19  
406 have no strict kin relationship with the 13 males (females highlighted in grey in Table 4). All other  
407 females present a minimum of one kin relationship with the male founders of the UMA.

408 **Table 4. Pedigree relationships for all female x male dyads (n = 949) of *Trachemys venusta venusta* of the UMA determined by**

409 **ML-RELATE.**

410

|                |    | <b>Males</b> |           |      |      |      |           |      |      |           |             |           |           |      |      |    |
|----------------|----|--------------|-----------|------|------|------|-----------|------|------|-----------|-------------|-----------|-----------|------|------|----|
|                |    |              | 10        | 13   | 21   | 22   | 25        | 31   | 35   | 37        | 46          | 47        | 60        | 75   | 83   |    |
|                |    | <i>HL</i>    | 0.40      | 0.27 | 0.38 | 0.34 | 0.25      | 0.26 | 0.11 | 0.23      | <b>0.60</b> | 0.50      | 0.48      | 0.47 | 0.14 |    |
| <b>Females</b> | 1  | <b>0.52</b>  |           |      |      |      |           |      |      |           | HS          |           | <b>FS</b> |      | HS   |    |
|                | 2  | 0.13         |           |      |      |      |           |      |      |           |             | HS        |           |      |      |    |
|                | 3  | 0.40         |           |      |      |      | <b>HS</b> |      |      |           |             |           |           |      |      |    |
|                | 4  | 0.23         | HS        |      |      |      |           |      |      | <b>HS</b> |             |           |           |      |      |    |
|                | 5  | 0.49         | <b>HS</b> |      | HS   |      |           |      |      |           |             | HS        | HS        |      |      |    |
|                | 6  | 0.11         |           | HS   |      |      |           |      | HS   | HS        | HS          |           |           |      |      |    |
|                | 7  | 0.13         | <b>HS</b> |      |      |      |           |      |      |           |             | <b>HS</b> |           |      |      |    |
|                | 8  | 0.36         | <b>HS</b> |      |      |      | <b>HS</b> |      |      |           |             |           | HS        |      |      |    |
|                | 9  | 0.25         | HS        | HS   |      |      |           |      |      |           | HS          |           |           |      |      | HS |
|                | 11 | 0.36         | HS        |      |      |      |           |      |      | HS        |             |           |           |      | HS   |    |

|    |             |           |           |           |           |           |           |           |           |  |    |  |    |    |
|----|-------------|-----------|-----------|-----------|-----------|-----------|-----------|-----------|-----------|--|----|--|----|----|
| 12 | 0.48        |           | <b>HS</b> |           |           |           | HS        |           | HS        |  | HS |  |    |    |
| 14 | 0.40        | HS        | <b>PO</b> |           |           |           |           |           |           |  |    |  |    |    |
| 15 | 0.26        | <b>FS</b> | HS        |           |           |           |           |           |           |  |    |  | HS |    |
| 16 | 0.02        |           | <b>HS</b> | HS        |           |           |           |           | HS        |  |    |  |    |    |
| 17 | <b>0.60</b> | HS        | <b>FS</b> | HS        |           | HS        |           | HS        |           |  |    |  |    |    |
| 18 | 0.24        | HS        | <b>HS</b> |           |           |           |           |           |           |  |    |  |    |    |
| 19 | 0.39        |           |           |           |           | <b>HS</b> |           | HS        |           |  |    |  |    |    |
| 20 | 0.20        |           |           | HS        | HS        | HS        |           |           |           |  |    |  |    | HS |
| 23 | <b>0.52</b> |           |           | <b>HS</b> | <b>HS</b> |           |           |           |           |  |    |  |    |    |
| 24 | 0.41        |           |           |           | HS        | <b>FS</b> |           | HS        |           |  |    |  |    |    |
| 26 | 0.37        |           |           | <b>HS</b> |           |           | <b>HS</b> |           | <b>FS</b> |  |    |  | HS |    |
| 27 | 0.11        |           | <b>HS</b> | <b>FS</b> |           |           | <b>HS</b> |           |           |  |    |  |    |    |
| 28 | 0.27        |           |           | <b>FS</b> |           |           | <b>HS</b> |           | <b>FS</b> |  |    |  |    |    |
| 29 | 0.26        |           | <b>FS</b> |           | HS        |           | <b>FS</b> | HS        |           |  |    |  |    |    |
| 30 | 0.40        |           |           |           |           | HS        |           | <b>PO</b> | <b>FS</b> |  |    |  |    |    |
| 32 | 0.43        |           |           |           |           |           | <b>FS</b> | <b>HS</b> | <b>PO</b> |  |    |  |    |    |

|    |             |           |    |           |           |           |           |           |           |           |           |           |    |    |
|----|-------------|-----------|----|-----------|-----------|-----------|-----------|-----------|-----------|-----------|-----------|-----------|----|----|
| 33 | 0.10        |           |    |           |           | <b>PO</b> | <b>PO</b> | <b>FS</b> |           |           |           |           |    |    |
| 34 | 0.13        |           |    |           | HS        |           | <b>PO</b> | HS        | <b>FS</b> |           |           | HS        |    |    |
| 36 | 0.37        |           |    |           |           |           |           | <b>FS</b> | HS        | HS        | HS        |           |    | HS |
| 38 | 0.24        |           |    |           |           |           |           |           |           |           |           |           |    |    |
| 39 | 0.22        |           |    | <b>FS</b> |           |           |           |           |           |           |           |           | HS |    |
| 40 | <b>0.52</b> |           |    |           |           | <b>HS</b> |           |           |           |           |           |           |    |    |
| 41 | 0.37        |           |    |           |           |           |           | HS        |           | HS        |           | HS        |    | HS |
| 42 | 0.23        | <b>FS</b> |    |           | <b>HS</b> |           |           |           |           |           |           | HS        |    |    |
| 43 | 0.41        |           | HS |           |           | <b>PO</b> |           |           | HS        |           |           |           |    |    |
| 44 | 0.35        |           |    |           |           |           |           | HS        |           |           | <b>HS</b> | HS        |    |    |
| 45 | 0.23        |           |    |           |           |           |           |           | <b>FS</b> | <b>PO</b> | HS        | HS        |    | HS |
| 48 | <b>0.62</b> |           |    |           |           |           |           |           |           |           | HS        | <b>FS</b> |    |    |
| 49 | 0.27        |           |    | HS        |           |           |           |           |           | <b>HS</b> | <b>PO</b> |           |    |    |
| 50 | <b>1.00</b> |           |    |           |           |           |           |           |           | <b>FS</b> |           |           |    |    |
| 51 | <b>0.51</b> |           |    |           |           |           |           |           |           | HS        |           |           |    |    |
| 52 | 0.22        |           |    |           |           |           |           |           |           |           | <b>FS</b> |           |    |    |



|    |             |  |  |    |           |           |           |    |    |           |           |           |  |  |
|----|-------------|--|--|----|-----------|-----------|-----------|----|----|-----------|-----------|-----------|--|--|
| 53 | 0.36        |  |  |    |           |           |           |    |    |           |           | HS        |  |  |
| 54 | 0.49        |  |  |    |           |           |           |    |    |           |           |           |  |  |
| 55 | 0.36        |  |  |    |           |           |           |    |    |           | <b>FS</b> |           |  |  |
| 56 | 0.49        |  |  |    |           |           | HS        |    |    |           | HS        | HS        |  |  |
| 57 | 0.49        |  |  |    | HS        |           |           |    |    |           | HS        |           |  |  |
| 58 | 0.11        |  |  |    | HS        |           | HS        |    |    |           | HS        | <b>HS</b> |  |  |
| 59 | 0.11        |  |  |    | <b>HS</b> | HS        | <b>FS</b> |    | HS |           | HS        |           |  |  |
| 61 | 0.36        |  |  |    |           | <b>HS</b> | <b>FS</b> |    |    | <b>HS</b> |           |           |  |  |
| 62 | 0.34        |  |  |    |           |           |           |    | HS | <b>HS</b> |           | <b>FS</b> |  |  |
| 63 | 0.22        |  |  | HS |           |           |           |    |    | HS        |           |           |  |  |
| 64 | 0.36        |  |  |    |           |           |           |    |    | HS        | <b>FS</b> | <b>HS</b> |  |  |
| 65 | 0.47        |  |  |    |           |           |           |    |    |           |           |           |  |  |
| 66 | 0.40        |  |  |    |           |           |           |    |    | <b>FS</b> | <b>FS</b> |           |  |  |
| 67 | <b>0.68</b> |  |  |    |           |           |           |    |    | HS        |           | HS        |  |  |
| 68 | 0.49        |  |  |    |           |           |           | HS |    |           |           |           |  |  |
| 69 | 0.49        |  |  |    |           |           |           |    |    | <b>FS</b> |           | HS        |  |  |

|    |      |           |           |           |           |    |           |    |  |  |    |    |           |           |           |
|----|------|-----------|-----------|-----------|-----------|----|-----------|----|--|--|----|----|-----------|-----------|-----------|
| 70 | 0.28 |           |           |           |           |    |           |    |  |  | HS | HS |           |           |           |
| 71 | 0.33 |           |           | HS        | HS        |    |           |    |  |  |    |    | <b>PO</b> |           | HS        |
| 72 | 0.25 |           |           | <b>FS</b> |           |    |           |    |  |  |    |    |           | HS        | HS        |
| 73 | 0.22 |           |           | HS        | HS        |    | HS        | HS |  |  |    |    |           | <b>PO</b> |           |
| 74 | 0.33 | HS        |           |           |           |    |           | HS |  |  |    |    |           | <b>FS</b> |           |
| 76 | 0.22 |           | HS        |           |           |    |           |    |  |  |    |    |           |           | <b>HS</b> |
| 77 | 0.40 |           |           |           | <b>FS</b> | HS | <b>HS</b> | HS |  |  |    |    |           | <b>HS</b> |           |
| 78 | 0.16 |           |           |           |           |    |           |    |  |  |    | HS |           |           |           |
| 79 | 0.21 |           | HS        |           |           |    |           |    |  |  |    |    |           |           | <b>FS</b> |
| 80 | 0.45 |           |           |           |           | HS | <b>HS</b> |    |  |  |    | HS |           |           |           |
| 81 | 0.14 | HS        |           |           |           |    |           |    |  |  | HS |    |           |           | HS        |
| 82 | 0.12 |           |           |           |           |    |           |    |  |  |    |    |           |           | <b>FS</b> |
| 84 | 0.39 |           |           |           |           | HS |           |    |  |  |    |    |           |           | <b>FS</b> |
| 85 | 0.41 | <b>HS</b> | HS        |           |           |    |           |    |  |  |    |    |           |           |           |
| 86 | 0.41 |           | <b>HS</b> |           |           |    |           |    |  |  |    |    |           |           | <b>FS</b> |

411 Only three kinds of relationship are indicated: Half-sibling (HS), full-sibling (FS), and parent-offspring (PO) meaning that when a pair  
412 has no indication it is unrelated. Pedigree indicated in bold corresponds to result of highest likelihood prediction while the grey color

413 indicates that this pedigree changed to unrelated after we applied the likelihood ratio test. Females highlighted in grey have no kin  
414 relationship with the 13 males. For all individuals, homozygosity (*HL*) is given as informative and values above 0.5 are indicated in bold.  
415

## 416 **Discussion**

417  
418 There are numerous studies on *Trachemys* spp, including topics such as general ecology [25, 55-  
419 56], biogeography [57], systematics [17, 58], and even as an invasive species [59-61]. This is  
420 probably because many species in this genus are included within the IUCN Red List and TFTSG  
421 list (Tortoise and Freshwater Turtle Specialist Group) or are not yet evaluated [62]. Genetic studies  
422 are also largely represented, generally focusing on phylogenic or biogeographic considerations [13-  
423 14, 16], for hybridization process [15], or even identifying genetic damage under radioactive effect  
424 [63]; however, population genetic studies are rarer [64-67]. Particularly, for *Trachemys venusta*,  
425 no genetic population study is reported to date. We present, the first results related to the population  
426 genetics of wild population of *T. venusta venusta* in Mexico compared to founder individuals of a  
427 captive group (Mexican UMA).

428  
429 With the exception of some studies that present low genetic diversity (value of  $H_e < 0.4$ ; [68-69]),  
430 freshwater turtles exhibit high values of genetic diversity (generally  $H_e > 0.6-0.7$ ; see Table 4 in  
431 [69] for examples, and [70]) based on microsatellites. Our values could be considered lower ( $H_e <$   
432  $0.6$ ) than many other freshwater turtles or even threatened species (see Table 4 in [69] for examples,  
433 and [70-71]), and are in agreement with values for wild populations of *Elusor macrurus* Cann &  
434 Legler 1994 (Testudines, Chelidae) an endangered Australian freshwater turtle [72]. The sole  
435 genetic study that reports value of genetic diversity for *Trachemys* spp. based on microsatellites  
436 showed low values for *T. taylori* Legler, 1960 ( $H_e$  from 0.442 to 0.569;  $H_o$  from 0.458 to 0.590)  
437 and very high values for *T. scripta elegans* Wied-Neuwied, 1839 ( $H_e = 0.809$ ;  $H_o = 0.828$ ) [67].  
438 Other population genetic studies that report levels of genetic diversity for *Trachemys* spp used

439 allozymes which makes comparison with microsatellites data difficult. In this respect, all studies  
440 showed very low values of genetic diversity ( $H < 0.15$ ; [64-66]). The relatively low value of genetic  
441 diversity observed for wild population of *T. venusta venusta* compared to other turtle species,  
442 suggests that this species deserves reinforced attention and probably higher level of protection  
443 considering the threshold of 0.54 proposed by Willoughby et al. [73] as a value to consider a species  
444 as Critically Endangered [72].

445  
446 Values of genetic diversity for captive population were slightly higher than wild population as  
447 reported for *Elusor macrurus* [72] and for *Dermatemys mawii* Gray, 1847 (Testudines,  
448 Dermatemydidae) [74]. Because founder individuals of the UMAs (captive population) come from  
449 two distinct localities: Pomposu that is within the Grijalva River Sub-Basin and El Espino in the  
450 Usumacinta River Sub-Basin (see Fig 1), the genetic pool of those founders could be higher due to  
451 the mix of genetic sources. This situation was reported for *Lithobates sevosus* Goin & Netting,  
452 1940 (Anura, Ranidae), a critically endangered frog from the southeastern USA [75], and for  
453 *Dermatemys mawii* a critically endangered freshwater turtle [74], suggesting that the captive  
454 population is genetically representative of natural populations [75] and could be used to found new  
455 wild populations [76]. Also, founder individuals are approximately 40 years of age, and genetic  
456 diversity represents the situation from several decades ago. The genetic diversity of the wild  
457 population of *T. venusta venusta* may have declined since the UMA was founded, probably due to  
458 habitat fragmentation and water pollution [19]. Indeed, the state of Tabasco lost around 60% of its  
459 wetlands at the beginning of the 21st century, mainly due to anthropogenic activities such as the  
460 oil industry, the establishment of new crop areas and grassland for livestock use, road construction,  
461 population growth, and increased pollution derived from these activities [20, 77]. Additionally, in  
462 Tabasco state, freshwater turtles are subject to intense hunting and illegal trading and trafficking

463 [78-80] that has contributed to a decline in population numbers leading to a loss of genetic  
464 diversity. It is reported that in Villahermosa and surrounding cities (e.g., Nacajuca, Comalcalco,  
465 Jalpa de Méndez, and Cunduacán) freshwater turtles were abundant, but today it is difficult to find  
466 turtles such as *T. venusta* [80]. Many species of turtles are characterized by a long generation time  
467 (often > 25 years), making a loss of genetic diversity or genetic differentiation among populations  
468 due to recent and/or anthropogenic events (e.g., habitat fragmentation) very difficult or impossible  
469 to detect (see examples in [70]). However, sexual maturity of *T. venusta* has been evaluated at  
470 approximately four to seven years [81] which results in five to 10 generations (40 years) between  
471 UMA founder individuals and the wild population analyzed in this study, thus allowing the  
472 observation of a loss of genetic diversity in the wild population due to recent anthropogenic  
473 pressure.

474

475 Although captive population (UMA) did not demonstrate a significant loss of heterozygotes, wild  
476 population shows significant loss of heterozygotes that could reveal high level of inbreeding and  
477 small population size that are probably a consequence of recent anthropogenic pressures (see  
478 above) on freshwater turtles in Tabasco state. Several species of freshwater turtles, such as *Apalone*  
479 *spinifera emoryi* Agassiz, 1857 (Testudines, Trionychidae), *Mesoclemmys dahli* Zangerl &  
480 Medem, 1958 (Testudines, Chelidae), *Chrysemys p. picta* Schneider, 1783 (Testudines, Emydidae),  
481 and *Clemmys guttata* Schneider, 1792 (Testudines, Emydidae) have shown evidence of genetic  
482 isolation, genetic differentiation as well as modest to high inbreeding rates, but surprisingly the  
483 values of heterozygosity in these species are medium to high (0.6-0.7) despite experiencing  
484 anthropogenic pressures [82-84]. As mentioned before, the decrease in genetic diversity of many  
485 species of turtles, even after a prolonged decrease in population size, may not be observed due to  
486 their long generation times and late maturity associated with chelonian life history [84-86].

487  
488 Bayesian and PCoA analysis of genetic structure among wild and captive populations revealed a  
489 relatively good separation between both probably reflecting the low-connectivity among sites  
490 where founder individuals originated. Indeed, as mentioned before, the Pomposu locality depends  
491 on the Grijavlva River Sub-Basin as well as wild populations considered in this work (captive  
492 individuals showing a dominant wild genetic profile in analysis). El Espino depends on the  
493 Usumacinta River Sub-Bassin (see Fig 1) and could be represented by captive individuals with the  
494 other genetic profile in STRUCTURE analysis.

495

## 496 Kindship analysis

497

498 The relationship coefficient evaluated for captive population (Tabasco State Government UMA)  
499 suggest a relatively low level of kinship (considering all pairs: female-male, female-female, and  
500 male-male) which probably reflects that the founding individuals of the UMA came from different  
501 populations. However, we highlighted the differences observed between programs (STORM and  
502 ML-RELATE) and between methods used in ML-RELATE (using or not the likelihood ratio test to  
503 evaluate the more probable relationship) which can give values of single to double (e.g., 45% for  
504 unrelated using STORM and 91% using ML-RELATE with ratio test).

505

506 From all founder females of the UMA ( $n = 73$ ), the stricter analysis provided by ML-RELATED  
507 enabled the identification of 19 females that present no kin relationship with males ( $n = 13$ ). This  
508 could result in a total of 247 potential dyads to establish an optimal breeding program in the UMA.  
509 In order to develop the optimal reproduction in a captive population, the number and the identity

510 of the founders is a key factor for the genetic pool [87]. According to these authors, only 15  
511 individuals are necessary to preserve a  $H_e$  of 0.54 based on a revision of 188 studies where genetic  
512 conservation approaches are used for breeding programs. Considering this, if only unrelated  
513 founders were considered for reproduction, the captive population of Tabasco would have an  
514 optimal number of founding individuals to ensure genetic diversity. The captive population of  
515 Tabasco could be used for the reintroduction of *T. venusta venusta*, considering that this species is  
516 in decline in its natural habitat with low genetic diversity (see above). For this, we recommended  
517 the use of the optimal females (no kin relationship with all males of the UMA), and the introduction  
518 of new founders to avoid genetic erosion [87]. To date, very few studies have used genetic  
519 information of founders to optimize breeding program and avoid inbreeding in turtle programs. For  
520 example, Miller et al. [2] evaluated the pedigree on three seasons of a captive breeding program of  
521 the Galápagos giant tortoise showing that the genetic diversity of the progeny was reduced in a  
522 single generation and there was a tendency towards the reduction of the physical shape when more  
523 related individuals were bred. Also, Spitzweg et al. [88] analyzed the genetic diversity and kin  
524 relationship of a turtle (*Batagur baska* Gray, 1830; Testudines, Geoemydidae) in captivity, and  
525 showed that most of the founder individuals that came from wildlife had a high kinship relation.

526  
527 Successful management and conservation programs for long-lived organisms are those that  
528 recognize the need for protection and biological knowledge of all life stages of the species they  
529 breed [89]. For this reason, our results have important implications for the conservation and  
530 management of *T. venusta venusta*, as they contribute to a better selection of pairs, decreasing the  
531 possibility of inbreeding in the generations born in captivity. Furthermore, through good genetic  
532 management, individuals could be released into the wild to improve the genetic diversity of the  
533 species. The program conducted with the highly endangered species of freshwater turtle *Batagur*



534 *trivittata* Duméril & Bibron, 1835 (Testudines, Geoemydidae) is an example of a successful genetic  
535 management program, where the breeding, reproduction, and release of captive individuals has  
536 resulted in an improvement in the wild population. A captive management program has been  
537 established for this species, and it was thought that only 12 breeding turtles existed in the wildlife.  
538 Since 2002, more than 700 individuals of this species have been obtained and after selecting  
539 individuals with a high genetic diversity and reintroducing them to their natural habitat, the  
540 program reported an increase in the fertility of the eggs [90]. Furthermore, our results could be  
541 used to create predictive models of exploitation, since *T. venusta venusta* is a highly valued species  
542 for human consumption and as pet, as has been proposed for the turtle *Trachemys scripta elegans*  
543 Wied-Neuwied, 1839 (Testudines, Emydidae), that is principally exploited as a pet [91].

544  
545 Finally, we believe that it is convenient to analyze the offspring of the founders already in the UMA  
546 in order to make a better use of this captive population. Another recommendation to consider in  
547 the implementation of a genetic management program for *T. venusta* could be the storage of sperm  
548 and the study of the multiple paternity, since it has been reported in several species of turtles [76]  
549 as a reproductive strategy that serves to maximize the genetic diversity of the offspring of long-  
550 lived organisms [92].

551

## 552 **Acknowledgments**

553

554 The authors would like to thank the Mexican Commission for the Knowledge and Use of  
555 Biodiversity (CONABIO) for the funding with number NE017-project: "Establishment of a genetic  
556 management program for the species *Dermatemys mawii* (white turtle) and *Trachemys venusta*

557 (hicotea) in Wildlife Management Units (UMA) to increase the genetic flow and connectivity of  
558 the Mesoamerican Biological Corridor in Tabasco " which allowed to carry out the present study.  
559 Thanks to the Mexican National Council of Science and Technology (CONACyT) for the  
560 maintenance grant of the Biol. Elsi Beatriz Recino Reyes for the master's studies in Environmental  
561 Sciences at Universidad Juárez Autónoma de Tabasco, Division of Biological Sciences. The  
562 capture of organisms was done with the permit number SPGA/DGVS/01085/16 issued by the  
563 Mexican Ministry of Environment and Natural Resources (SEMARNAT). We would also like to  
564 thank Dr Humberto Hernández Trejo PhD for his contribution of information to strengthen the  
565 discussion. Thanks to Dr. Leon David for helping to produce the map of Fig 1.

566

## 567 **Data Accessibility Statement**

568

569 The morphometric and weight data taken from *Trachemys venusta venusta* can be found at  
570 Knowledge Network for Biocomplexity Digital Repository: doi:10.5063/F1C53J44.

571

## 572 **References**

573

- 574 1. Valiente-Banuet A, Aizen MA, Alcántara JM, Arroyo J, Cocucci A, Galetti M, et al. Beyond  
575 species loss: the extinction of ecological interactions in a changing world. *Funct Ecol.* 2015;  
576 29: 299-307.
- 577 2. Miller JM, Quinzin MC, Scheibe EH, Ciofi C, Villalva F, Tapia W, et al. Genetic pedigree  
578 analysis of the pilot breeding program for the rediscovered Galapagos giant tortoise from  
579 Floreana island. *J Hered.* 2018; 109: 620-630.

- 580 3. Ballou JD, Lees C, Faust LJ, Long S, Lynch C, Bingaman Lackey L, et al. Demographic and  
581 genetic management of captive populations. In: Kleiman DG, Thomson KV, Keirk-Baer C,  
582 editors. Wild mammals in captivity: principles and techniques for zoo management. University  
583 of Chicago Press; 2010. pp. 219-252.
- 584 4. Ortega-Argueta A, González-Zamora A, Contreras-Hernández A. A framework and indicators  
585 for evaluating policies for conservation and development: The case of wildlife management  
586 units in Mexico. *Environ Sci Policy*. 2016; 63:91-100.
- 587 5. Weber M, García-Marmolejo G, Reyna-Hurtado R. The tragedy of the commons: wildlife  
588 management units in southeastern Mexico. *Wildl Soc Bull*. 2006; 34: 1480-1488.
- 589 6. Valdez R, Guzmán-Aranda JG, Abarca FJ, Tarango-Arámbula LA, Clemente-Sánchez F.  
590 Wildlife Conservation and Management in Mexico. *Wildl Soc Bull*. 2006; 34(2): 270-282.
- 591 7. SEMARNAT. Programa de Conservación de la Vida Silvestre y Diversificación Productiva en  
592 el Sector Rural. México. Secretaria de Medio Ambiente, Recursos Naturales y Pesca, México;  
593 1997.
- 594 8. de Benito RR. Las unidades de manejo para la conservación de vida silvestre y el Corredor  
595 Biológico Mesoamericano México. Comisión Nacional para el Conocimiento y Uso de la  
596 Biodiversidad. México; 2009.
- 597 9. Ballou JD, Lacy RC. Identifying genetically important individuals for management of genetic  
598 variation in pedigreed populations. In: Ballou JD, Gilpin M, Foose T, editors. Population  
599 management for survival and recovery. Columbia University Press; 1995. pp. 76-111.
- 600 10. Williams SE, Hoffman EA. Minimizing genetic adaptation in captive breeding programs: a  
601 review. *Biol Conserv*. 2009; 142: 2388-2400.

- 602 11. Zarza E, Reynoso VH, Emerson BC. Genetic tools for assisting sustainable management and  
603 conservation of the spiny-tailed iguana, *Ctenosaura pectinata*. *Herpetol Conserv Biol*. 2016;  
604 11: 255–264.
- 605 12. Seidel ME. Taxonomic observations on extant species and subspecies of slider turtles, genus  
606 *Trachemys*. *J Herpetol*. 2002; 36: 285-292.
- 607 13. Parham JF, Papenfuss TJ, Buskirk JR, Parra-Olea G, Chen JY, Simison WB. *Trachemys ornata*  
608 or not *ornata*: reassessment of a taxonomic revision for Mexican *Trachemys*. *Proc Calif Acad*  
609 *Sci*. 2015; 62: 359-367.
- 610 14. Fritz U, Stuckas H, Vargas-Ramírez M, Hundsdörfer AK, Maran J, Päckert M. Molecular  
611 phylogeny of Central and South American slider turtles: implications for biogeography and  
612 systematics (Testudines: Emydidae: *Trachemys*). *J Zool Syst Evol Res*. 2012; 50: 125-136.
- 613 15. Parham JF, Papenfuss TJ, Van Dijk PP, Wilson BS, Marte C, Schettino LR, et al. Genetic  
614 introgression and hybridization in Antillean freshwater turtles (*Trachemys*) revealed by  
615 coalescent analyses of mitochondrial and cloned nuclear markers. *Mol Phylogenet Evol*. 2013;  
616 67: 176-187.
- 617 16. Vargas-Ramírez M, del Valle C, Ceballos CP, Fritz U. *Trachemys medemi* n. sp. from  
618 northwestern Colombia turns the biogeography of South American slider turtles upside down.  
619 *J Zool Syst Evol Res*. 2017; 55: 326-339.
- 620 17. Ernst CH, Seidel ME. *Trachemys venusta*. In: Price AH, editor. *Catalogue of American*  
621 *Amphibians and Reptiles (CAAR)*. Society for the Study of Amphibian and Reptiles; 2006. pp.  
622 832.1-832.12
- 623 18. Guevara Chumacero M, Pichardo Fragoso A, Martínez Cornelio M. La tortuga en Tabasco:  
624 comida, identidad y representación. *Estudios de Cultura Maya*. 2017; 49: 97-122.

- 625 19. Tudela F. La modernización forzada del trópico: El caso de Tabasco, proyecto integrado del  
626 Golfo. IFIAS. México, D.F; 1992
- 627 20. Palomeque de la Cruz MA, Galindo Alcántara A, Sánchez AJ, Escalona Maurice MJ. Pérdida  
628 de humedales y vegetación por urbanización en la cuenca del río Grijalva, México.  
629 Investigaciones Geográficas. 2017; 68: 151-172.
- 630 21. Flores-Villela O, Canseco-Márquez L. Nuevas especies y cambios taxonómicos para la  
631 herpetofauna de México. Acta Zool Mex (n.s.). 2004; 20: 115-144.
- 632 22. SEMARNAT. Secretaría de Medio Ambiente y Recursos Naturales. Norma Oficial Mexicana  
633 NOM-059-SEMARNAT-2010. Diario Oficial de la Federación (DOF); 2010.
- 634 23. Blouin MS. DNA-based methods for pedigree reconstruction and kinship analysis in natural  
635 populations. Trends Ecol Evol. 2003; 18: 503-511.
- 636 24. Vogt RC. New methods for trapping aquatic turtles. Copeia. 1980; 1980: 368-371.
- 637 25. Gibbons JW. Life history and ecology of the slider turtle. Washington, DC: Smithsonian  
638 Institution Press; 1990.
- 639 26. SEMARNAT. Memorias del Taller de capacitación para la conservación y aprovechamiento  
640 sustentable de tortugas dulceacuícolas del sur-sureste de México. Catemaco, Veracruz; 2009.
- 641 27. Proebstel BS, Evas RP, Shiozawa DK, Williams RN. (1993). Preservation of nonfrozen tissue  
642 samples from a salmonine fish *Brachymystax lenok* (Pallas) for DNA analysis. J Ichthyol. 1993;  
643 32: 9–17.
- 644 28. Simison WB, Sellas AB, Feldheim KA, Parham JF. Isolation and characterization of  
645 microsatellite markers for identifying hybridization and genetic pollution associated with red-  
646 eared slider turtles (*Trachemys scripta elegans*). Conserv Genet Res. 2013; 5: 1139-1140.

- 647 29. Rozen S, Skaletsky HJ. Primer3 on the WWW for general users and for biologist programmers.  
648 In: Krawetz S, Misener S, editors. Bioinformatics methods and protocols: methods in molecular  
649 biology. Humana Press, Totowa; 2000. pp. 365–386.
- 650 30. Valière N. GIMLET: a computer program for analysing genetic individual identification data.  
651 Mol Ecol Notes. 2002; 2: 377-379.
- 652 31. Bonin A, Bellemain E, Bronken Eidesen P, Pompanon F, Brochmann C, et al. How to track  
653 and assess genotyping errors in population genetics studies. Mol Ecol. 2004; 13: 3261–3273.
- 654 32. Machkour-M'Rabet S, Cruz-Medina J, García-De León FJ, De Jesús-Navarrete A, Hénaut Y.  
655 Connectivity and genetic structure of the queen conch on the Mesoamerican Reef. Coral Reefs.  
656 2017; 36: 535-548.
- 657 33. Peakall R, Smouse PE. GenAEx 6.5: genetic analysis in Excel. Population genetic software  
658 for teaching and research-an update. Bioinformatics. 2012; 28: 2537-2539.
- 659 34. Hammer O, Harper DAT, Ryan PD. PAST: Paleontological Statistics Software Package for  
660 Education and Data Analysis. Palaeontol Electron. 2001; 4: 9pp.
- 661 35. Kalinowski ST. Counting alleles with rarefaction: private alleles and hierarchical sampling  
662 designs. Conserv Genet. 2004; 5: 539-543.
- 663 36. Kalinowski ST. Hp-rare 1.0: a computer program for performing rarefaction on measures of  
664 allelic richness. Mol Ecol Notes. 2005; 5: 187-189.
- 665 37. Kalinowski ST, Taper ML, Marshall TC. Revising how the computer program CERVUS  
666 accommodates genotyping error increases success in paternity assignment. Mol Ecol. 2007; 16:  
667 1099-1106.
- 668 38. Amos W, Wilmer JW, Fullard K, Burg TM, Croxall JP, Bloch D, et al. The influence of parental  
669 relatedness on reproductive success. Proc R Soc Lond B: Biol Sci. 2001; 268: 2021-2027.

- 670 39. Aparicio JM, Ortego J, Cordero PJ. What should we weigh to estimate heterozygosity, alleles  
671 or loci? *Mol Ecol.* 2006; 15: 4659-4665.
- 672 40. Raymond M, Rousset, F. GENEPOP (version 1.2): population genetics software for exact test  
673 and ecumenicism. *J Hered.* 1995; 86: 248–249.
- 674 41. Rousset, F. Genepop'007: a complete reimplementaion of the Genepop software for Windows  
675 and Linux. *Mol Ecol Res.* 2008; 8: 103–106.
- 676 42. Chapuis MP, Estoup A. Microsatellite null alleles and estimation of population differentiation.  
677 *Mol Biol Evol.* 2006; 24: 621-631.
- 678 43. Do C, Waples RS, Peel D, Macbeth GM, Tillett BJ, Ovenden JR. NeEstimator v2:  
679 re-implementation of software for the estimation of contemporary effective population size  
680 ( $N_e$ ) from genetic data. *Mol Ecol Res.* 2014; 14: 209-214.
- 681 44. Waples RS, Do CHI. LDNE: a program for estimating effective population size from data on  
682 linkage disequilibrium. *Mol Ecol Res.* 2008; 8: 753-756.
- 683 45. Cornuet JM, Luikart G. Description and power analysis of two tests for detecting recent  
684 population bottlenecks from allele frequency data. *Genetics.* 1996; 144: 2001-2014.
- 685 46. Piry S, Luikart G, Cornuet JM. BOTTLENECK: a computer program for detecting recent  
686 reductions in the effective population size using allele frequency data. *J Hered.* 1999; 90: 502–  
687 503.
- 688 47. Pritchard JK, Stephens M, Donnelly P. Inference of population structure using multilocus  
689 genotype data. *Genetics.* 2000; 155: 945-959.
- 690 48. Evanno G, Regnaut S, Goudet J. Detecting the number of clusters of individuals using the  
691 software STRUCTURE: a simulation study. *Mol Ecol.* 2005; 14: 2611-2620.

- 692 49. Earl DA, Von Holdt BM. STRUCTURE HARVESTER: A website and program for visualizing  
693 STRUCTURE output and implementing the Evanno method. *Conserv Genet Res.* 2011; 4:  
694 359–361.
- 695 50. Frasier TR. STORM: software for testing hypotheses of relatedness and mating patterns. *Mol*  
696 *Ecol Res.* 2008; 8: 1263-1266.
- 697 51. Valiere N, Bonenfant C, Toïgo C, Luikart G, Gaillard JM, Klein F. Importance of a pilot study  
698 for non-invasive genetic sampling: genotyping errors and population size estimation in red  
699 deer. *Conserv Genet.* 2007; 8: 69-78.
- 700 52. Řičanová Š, Bryja J, Cosson JF, Gedeon C, Choleva L, Ambros M, et al. Depleted genetic  
701 variation of the European ground squirrel in Central Europe in both microsatellites and the  
702 major histocompatibility complex gene: implications for conservation. *Conserv Genet.* 2011;  
703 12: 1115-1129.
- 704 53. Queller DC, Goodnight KF. Estimating relatedness using genetic markers. *Evolution.* 1989;  
705 43: 258-275.
- 706 54. Kamel SJ, Hughes AR, Grosberg RK, Stachowicz JJ. Fine-scale genetic structure and  
707 relatedness in the eelgrass *Zostera marina*. *Mar Ecol Prog Ser.* 2012; 447: 127-137.
- 708 55. Gradela A, Santiago TOC, Pires IC, Silva ADCS, de Souza LC, de Faria MD, et al. Sexual  
709 Dimorphism in Red-Eared Sliders (*Trachemys scripta elegans*) from the Wild Animal Triage  
710 Center of the Tiete Ecological Park, São Paulo, Brazil. *Acta Sci Vet.* 2017; 45: 1-10.
- 711 56. Works AJ, Olson DH. Diets of Two Nonnative Freshwater Turtle Species (*Trachemys scripta*  
712 and *Pelodiscus sinensis*) in Kawai Nui Marsh, Hawaii. *J Herpetol.* 2018; 52: 444-452.
- 713 57. Ennen JR, Matamoros WA, Agha M, Lovich JE, Sweat SC, Hoagstrom CW. Hierarchical,  
714 quantitative biogeographic provinces for all North American turtles and their contribution to  
715 the biogeography of turtles and the continent. *Herpetol Monogr.* 2017; 31: 142-168.



- 716 58. McCord WP, Joseph-Ouni M, Hagen C, Blanck T. Three new subspecies of *Trachemys venusta*  
717 (Testudines: Emydidae) from Honduras, northern Yucatán (Mexico), and pacific coastal  
718 Panama. *Reptilia*. 2010; 71: 39-49.
- 719 59. Cadi A, Joly P. Competition for basking places between the endangered European pond turtle  
720 (*Emys orbicularis galloitalica*) and the introduced red-eared slider (*Trachemys scripta*  
721 *elegans*). *Can J Zool*. 2003; 81: 1392-1398.
- 722 60. Rodrigues JFM, Coelho MTP, Diniz-Filho JAF. Exploring intraspecific climatic niche  
723 conservatism to better understand species invasion: the case of *Trachemys dorbigni*  
724 (Testudines, Emydidae). *Hydrobiologia*. 2016; 779: 127-134.
- 725 61. Martins BH, Azevedo F, Teixeira J. First reproduction report of *Trachemys scripta* in Portugal-  
726 Ria Formosa Natural Park, Algarve. *Limnetica*. 2018; 37: 61-67.
- 727 62. Rhodin AG, Stanford CB, Van Dijk PP, Eisemberg C, Luiselli L, Mittermeier RA, et al. Global  
728 conservation status of turtles and tortoises (Order Testudines). *Chelonian Conserv Bi*. 2018;  
729 17: 135-161.
- 730 63. Lamb T, Bickham JW, Gibbons JW, Smolen MJ, McDowell S. Genetic damage in a population  
731 of slider turtles (*Trachemys scripta*) inhabiting a radioactive reservoir. *Arch Environ Con Tox*.  
732 1991; 20: 138-142.
- 733 64. Scribner KT, Smith MH, Gibbons JW. Genetic differentiation among local populations of the  
734 yellow-bellied slider turtle (*Pseudemys scripta*). *Herpetologica*. 1984; 40: 382-387.
- 735 65. Smith MH, Scribner KT. Population genetics of the slider turtle. In Gibbons JW, editor. *Life*  
736 *History and Ecology of the Slider Turtle*. Smithsonian Institution Press, Washington, D.C.;  
737 1990. pp. 74-81.
- 738 66. Martínez LM, Bock BC, Páez VP. Population genetics of the slider turtle (*Trachemys scripta*  
739 *callirostris*) in the Mompos Depression, Colombia. *Copeia*. 2007; 2007: 1001-1005.

- 740 67. McGaugh SE. Comparative population genetics of aquatic turtles in the desert. *Conserv Genet.*  
741 2012; 13: 1561-1576.
- 742 68. Echelle AA, Hackler JC, Lack JB, Ballard SR, Roman J, Fox SF, et al. Conservation genetics  
743 of the alligator snapping turtle: cytonuclear evidence of range-wide bottleneck effects and  
744 unusually pronounced geographic structure. *Conserv Genet.* 2010; 11: 1375-1387.
- 745 69. Vargas-Ramírez M, Stuckas H, Castano-Mora OV, Fritz U. Extremely low genetic diversity  
746 and weak population differentiation in the endangered Colombian river turtle *Podocnemis*  
747 *lewyana* (Testudines: Podocnemididae). *Conserv Genet.* 2012; 13: 65-77.
- 748 70. Davy CM, Bernardo PH, Murphy RW. A Bayesian approach to conservation genetics of  
749 Blanding's turtle (*Emys blandingii*) in Ontario, Canada. *Conserv Genet.* 2014; 15: 319-330.
- 750 71. Petre C, Selman W, Kreiser B, Pearson SH, Wiebe JJ. Population genetics of the diamondback  
751 terrapin, *Malaclemys terrapin*, in Louisiana. *Conserv Genet.* 2015; 16: 1243-1252.
- 752 72. Schmidt DJ, Espinoza T, Connell M, Hughes JM. Conservation genetics of the Mary River  
753 turtle (*Elusor macrurus*) in natural and captive populations. *Aquat Conserv* 2018; 28: 115-123.
- 754 73. Willoughby JR, Sundaram M, Wijayawardena BK, Kimble SJ, Ji Y, Fernandez NB, et al. The  
755 reduction of genetic diversity in threatened vertebrates and new recommendations regarding  
756 IUCN conservation rankings. *Biol Conserv.* 2015; 191: 495-503.
- 757 74. Gallardo-Alvárez MI, Leshner-Gordillo JM, Machkour-M'Rabet S, Zenteno-Ruiz CE, Olivera-  
758 Gómez LD, del Rosario Barragán-Vázquez M, et al. Genetic diversity and population structure  
759 of founders from wildlife conservation management units and wild populations of critically  
760 endangered *Dermatemys mawii*. *Glob Ecol Conserv.* 2019; 19: e00616.
- 761 75. Hinkson KM, Henry NL, Hensley NM, Richter SC. Initial founders of captive populations are  
762 genetically representative of natural populations in critically endangered dusky gopher frogs,  
763 *Lithobates sevosus*. *Zoo Biol.* 2016; 35: 378-384.

- 764 76. Edwards T, Cox EC, Buzzard V, Wiese C, Hillard LS, Murphy RW. Genetic assessments and  
765 parentage analysis of captive Bolson tortoises (*Gopherus flavomarginatus*) inform their  
766 “rewilding” in New Mexico. PLOS ONE. 2014; 9: e102787.
- 767 77. Melchor H, Isela G, Ruíz Rosado O, Sol Sánchez Á, Valdez Hernández JI. Cambios de uso del  
768 suelo en manglares de la costa de Tabasco. Rev Mexicana cienc agríc. 2016; 7(SPE14): 2757-  
769 2767.
- 770 78. PROFEPA. Asegura PROFEPA 30 tortugas en Tabasco. PROFEPA.gob. 2014. Available from:  
771 [http://www.profepa.gob.mx/innovaportal/v/5687/1/mx.wap/asegura\\_profepa\\_30\\_tortugas\\_en](http://www.profepa.gob.mx/innovaportal/v/5687/1/mx.wap/asegura_profepa_30_tortugas_en)  
772 [\\_tabasco.html](http://www.profepa.gob.mx/innovaportal/v/5687/1/mx.wap/asegura_profepa_30_tortugas_en_tabasco.html)
- 773 79. PROFEPA. (2015). Remite PROFEPA a MPF a sujeto en posesión de ejemplares de vida  
774 silvestre en situación de riesgo. PROFEPA.gob. 2015. Available from:  
775 [http://www.profepa.gob.mx/innovaportal/v/7159/1/mx/remite\\_profepa\\_a\\_mpf\\_a\\_sujeto\\_en\\_p](http://www.profepa.gob.mx/innovaportal/v/7159/1/mx/remite_profepa_a_mpf_a_sujeto_en_p)  
776 [osesion\\_de\\_ejemplares\\_de\\_vida\\_silvestre\\_en\\_situacion\\_de\\_riesgo.html](http://www.profepa.gob.mx/innovaportal/v/7159/1/mx/remite_profepa_a_mpf_a_sujeto_en_posesion_de_ejemplares_de_vida_silvestre_en_situacion_de_riesgo.html)
- 777 80. Reynoso VH, Vázquez Cruz ML, Rivera Arroyo RC. Estado de conservación, uso, gestión,  
778 comercio y cumplimiento de los criterios de inclusión a los Apéndices de la CITES para las  
779 especies *Claudius angustatus* y *Staurotypus triporcatus*. Universidad Nacional Autónoma de  
780 México. Instituto de Biología. Informe final SNIBCONABIO, Ciudad de México. 2016.  
781 Available from: <http://www.conabio.gob.mx/institucion/proyectos/resultados/InfMM009.pdf>
- 782 81. Torres KL, Franyutti AAH, Aranzábal MDCU, Vidal UH. Características reproductoras de la  
783 tortuga dulceacuícola hicotea (*Trachemys venusta*). Kuxulkab'. 2011; 17: 43-49.
- 784 82. Mali I, Villamizar-Gomez A, Guerra TM, Vandewege MW, Forstner MR. Population genetics  
785 of Texas spiny softshell turtles (*Apalone spinifera emoryi*) under various anthropogenic  
786 pressures in two distinct regions of their range in Texas. Chelonian Conserv Bi. 2015a; 14: 148-  
787 156.

- 788 83. Gallego-García N, Vargas-Ramírez M, Forero-Medina G, Caballero S. Genetic evidence of  
789 fragmented populations and inbreeding in the Colombian endemic Dahl's toad-headed turtle  
790 (*Mesoclemmys dahli*). *Conserv Genet.* 2018; 19: 221-233.
- 791 84. Buchanan SW, Kolbe JJ, Wegener JE, Atutubo JR, Karraker NE. A Comparison of the  
792 Population Genetic Structure and Diversity between a Common (*Chrysemys p. picta*) and an  
793 Endangered (*Clemmys guttata*) Freshwater Turtle. *Diversity.* 2019; 11: 99.
- 794 85. Kuo CH, Janzen FJ. Genetic effects of a persistent bottleneck on a natural population of ornate  
795 box turtles (*Terrapene ornata*). *Conserv Genet.* 2004; 5: 425-437.
- 796 86. Willoughby JR, Sundaram M, Lewis TL, Swanson BJ. Population decline in a long-lived  
797 species: the wood turtle in Michigan. *Herpetologica.* 2013; 69: 186-198.
- 798 87. Witzemberger KA, Hochkirch A. Ex situ conservation genetics: a review of molecular studies  
799 on the genetic consequences of captive breeding programmes for endangered animal species.  
800 *Biodivers Conserv.* 2011; 20: 1843-1861.
- 801 88. Spitzweg C, Praschag P, DiRuzzo S, Fritz U. Conservation genetics of the northern river  
802 terrapin (*Batagur baska*) breeding project using a microsatellite marker system.  
803 *SALAMANDRA.* 2018; 54: 63-70.
- 804 89. Congdon JD, Dunham AE, van Loben Sels RC. Delayed sexual maturity and demographics of  
805 Blanding's turtles (*Emydoidea blandingii*): implications for conservation and management of  
806 long-lived organisms. *Conserv Biol.* 1993; 7: 826-833.
- 807 90. Çilingir FG, Rheindt FE, Garg KM, Platt K, Platt SG, Bickford DP. Conservation genomics of  
808 the endangered Burmese roofed turtle. *Conserv Biol.* 2017; 31: 1469-1476.
- 809 91. Mali I, Wang HH, Grant WE, Feldman M, Forstner MR. Modeling commercial freshwater  
810 turtle production on US farms for pet and meat markets. *PLOS ONE.* 2015b; 10: e0139053.

811 92. Davy CM, Edwards T, Lathrop A, Bratton M, Hagan M, Henen B, et al. Polyandry and multiple  
812 paternities in the threatened Agassiz's desert tortoise, *Gopherus agassizii*. *Conserv Genet.*  
813 2011; 12: 1313.

814

## 815 **Supporting information caption**

816

817 **S1 Table. Analysis of molecular variance (AMOVA) for *Trachemys venusta venusta* in south**  
818 **Mexico.** When two groups are considered (UMA vs wild populations) (A), and when localities of  
819 wild individuals are included in the analysis (B).

820

821 **S1 Fig. Distribution of frequencies of internal relatedness (*IR*) for *Trachemys venusta venusta***  
822 **in south Mexico.** In UMA (purple) and in wild population (blue).

823

824 **S2 Fig. Distribution of frequencies of homozygosity by loci (*HL*) for *Trachemys venusta venusta***  
825 **in south Mexico.** UMA (purple) and wild population (blue).

826

827 **S3 Fig. Identification of the optimal number of groups (clusters) using the Delta K method**  
828 **implemented in STRUCTURE Harvester website.**



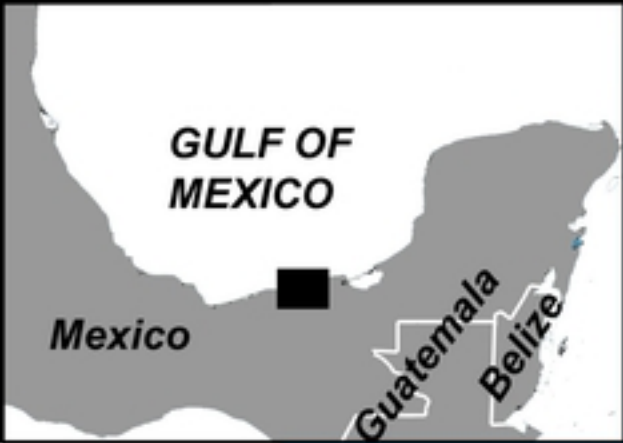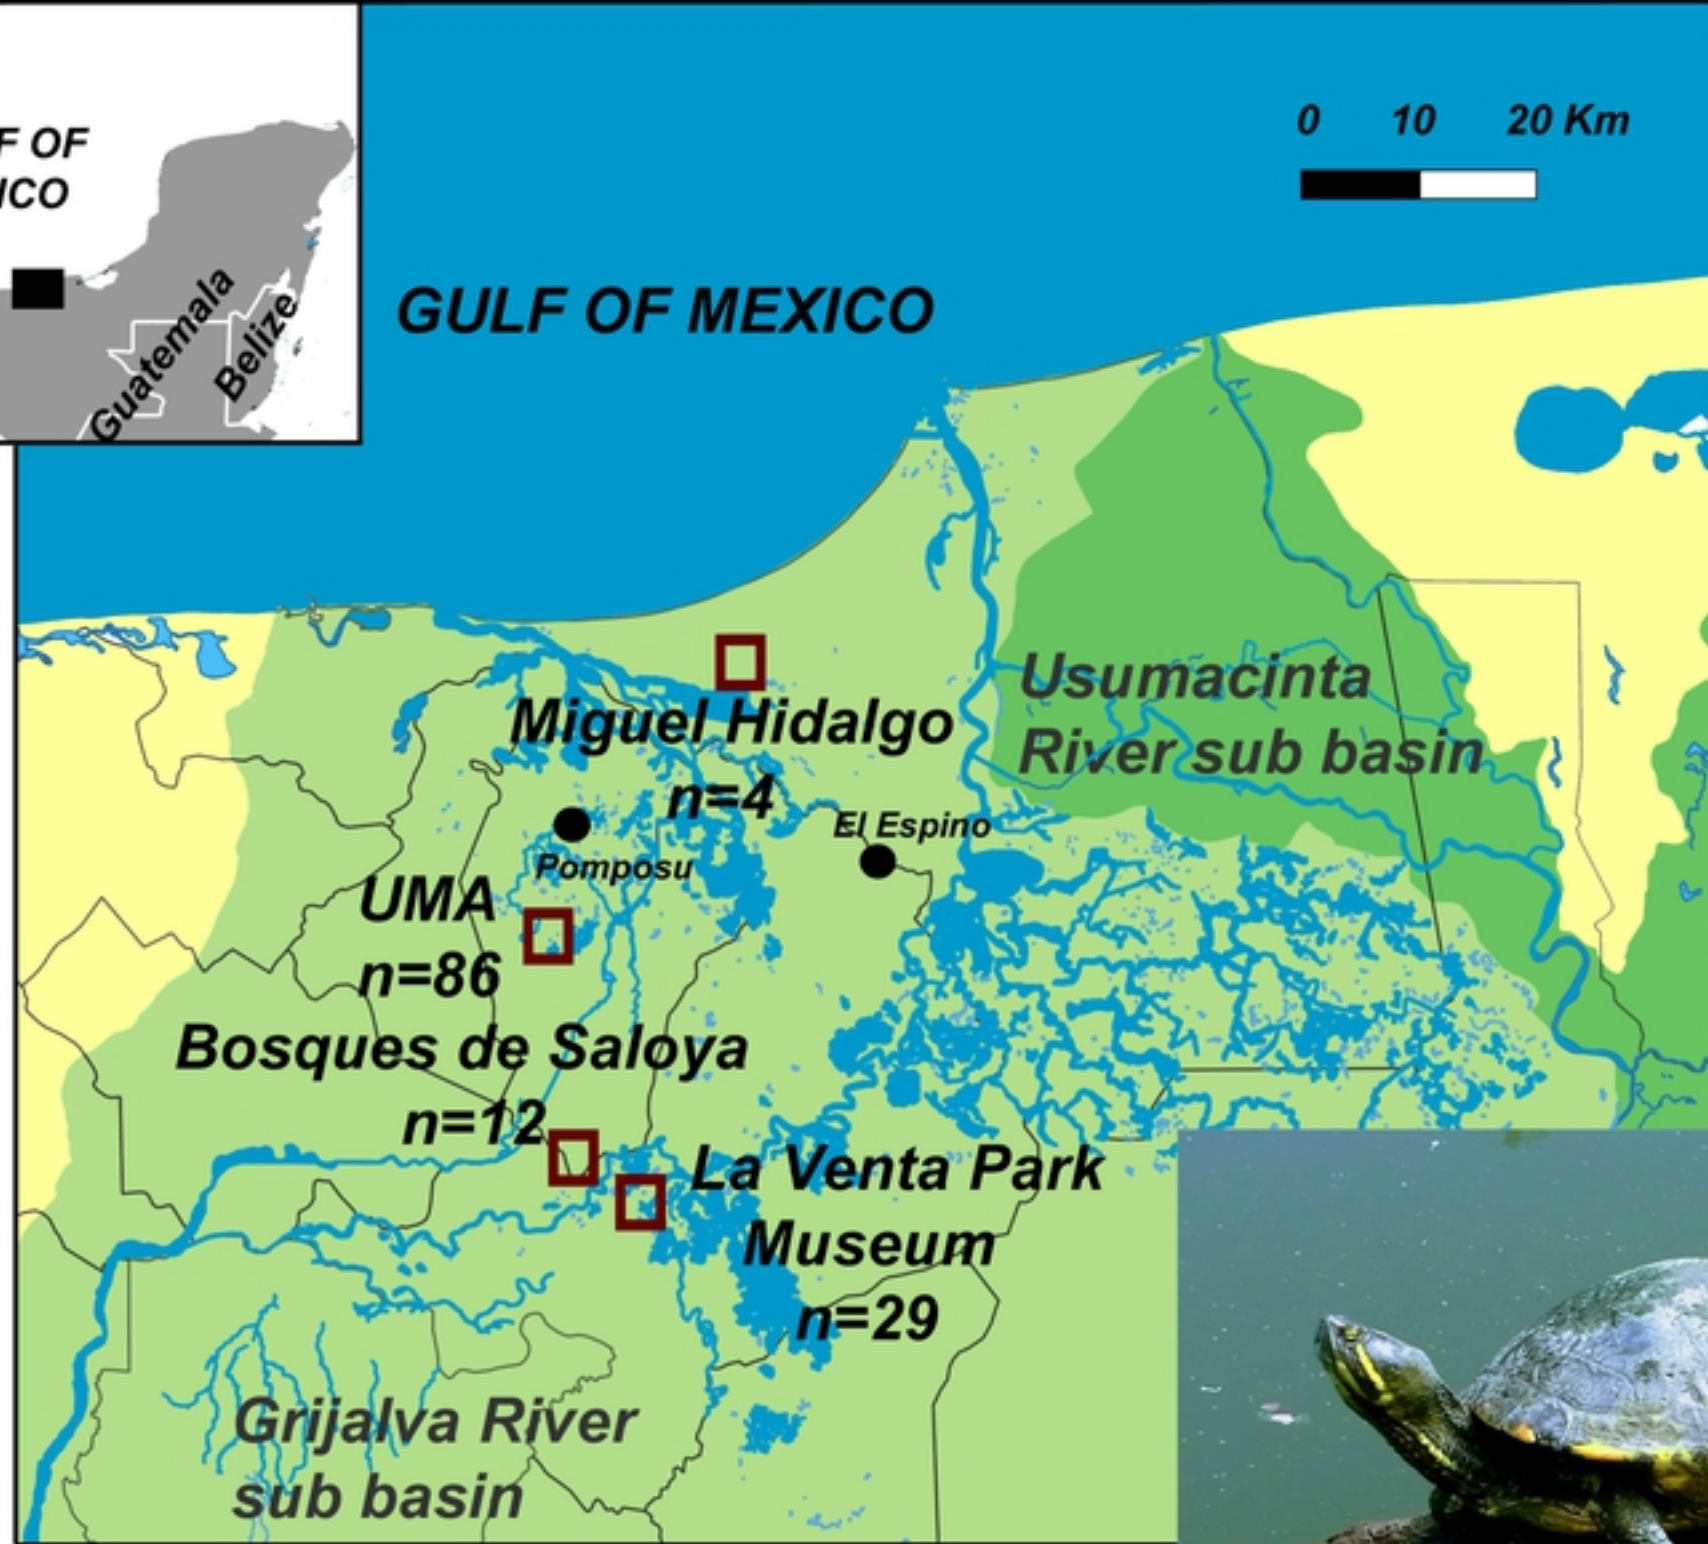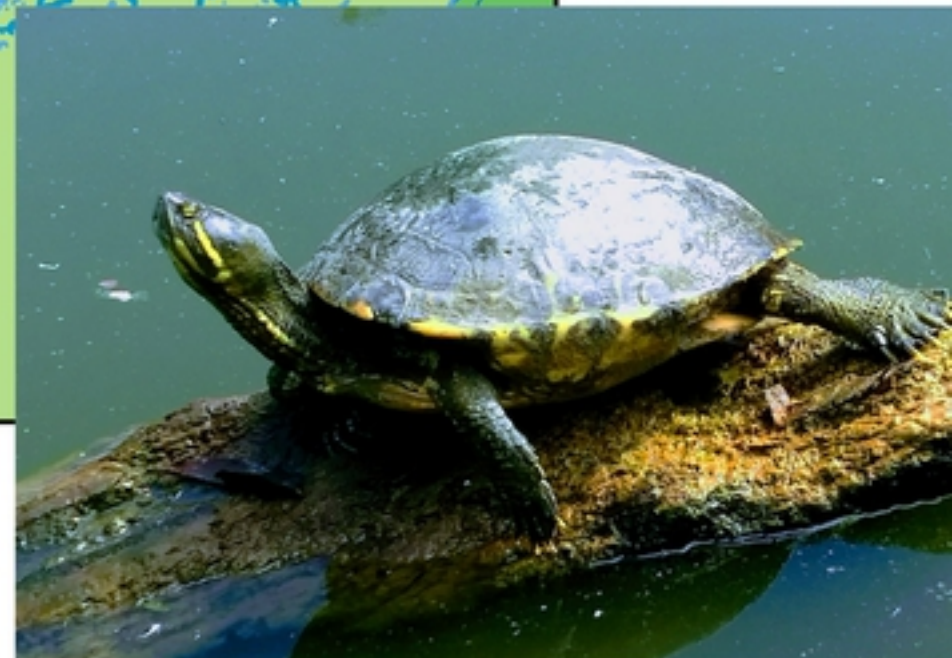

Map

bioRxiv preprint doi: <https://doi.org/10.1101/2020.01.27.920983>; this version posted January 28, 2020. The copyright holder for this preprint (which was not certified by peer review) is the author/funder, who has granted bioRxiv a license to display the preprint in perpetuity. It is made available under aCC-BY 4.0 International license.

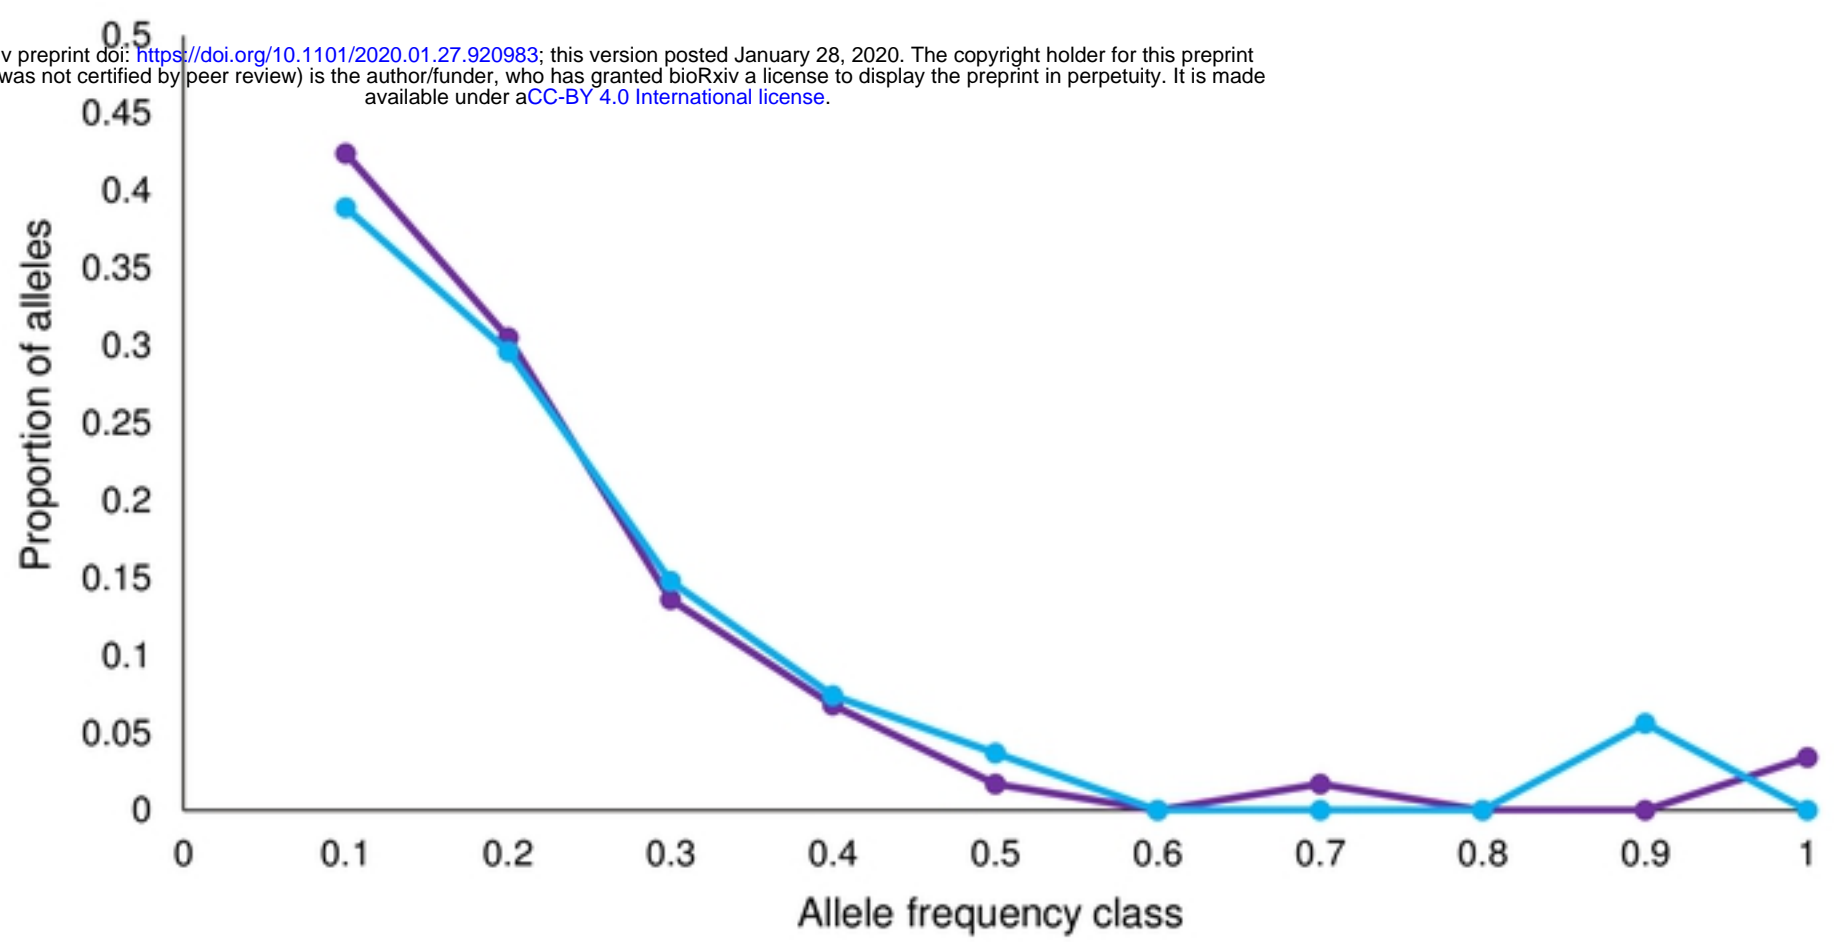

L-shaped distribution graph for detecting bottleneck

bioRxiv preprint doi: <https://doi.org/10.1101/2020.01.27.920983>; this version posted January 28, 2020. The copyright holder for this preprint (which was not certified by peer review) is the author/funder, who has granted bioRxiv a license to display the preprint in perpetuity. It is made available under aCC-BY 4.0 International license.

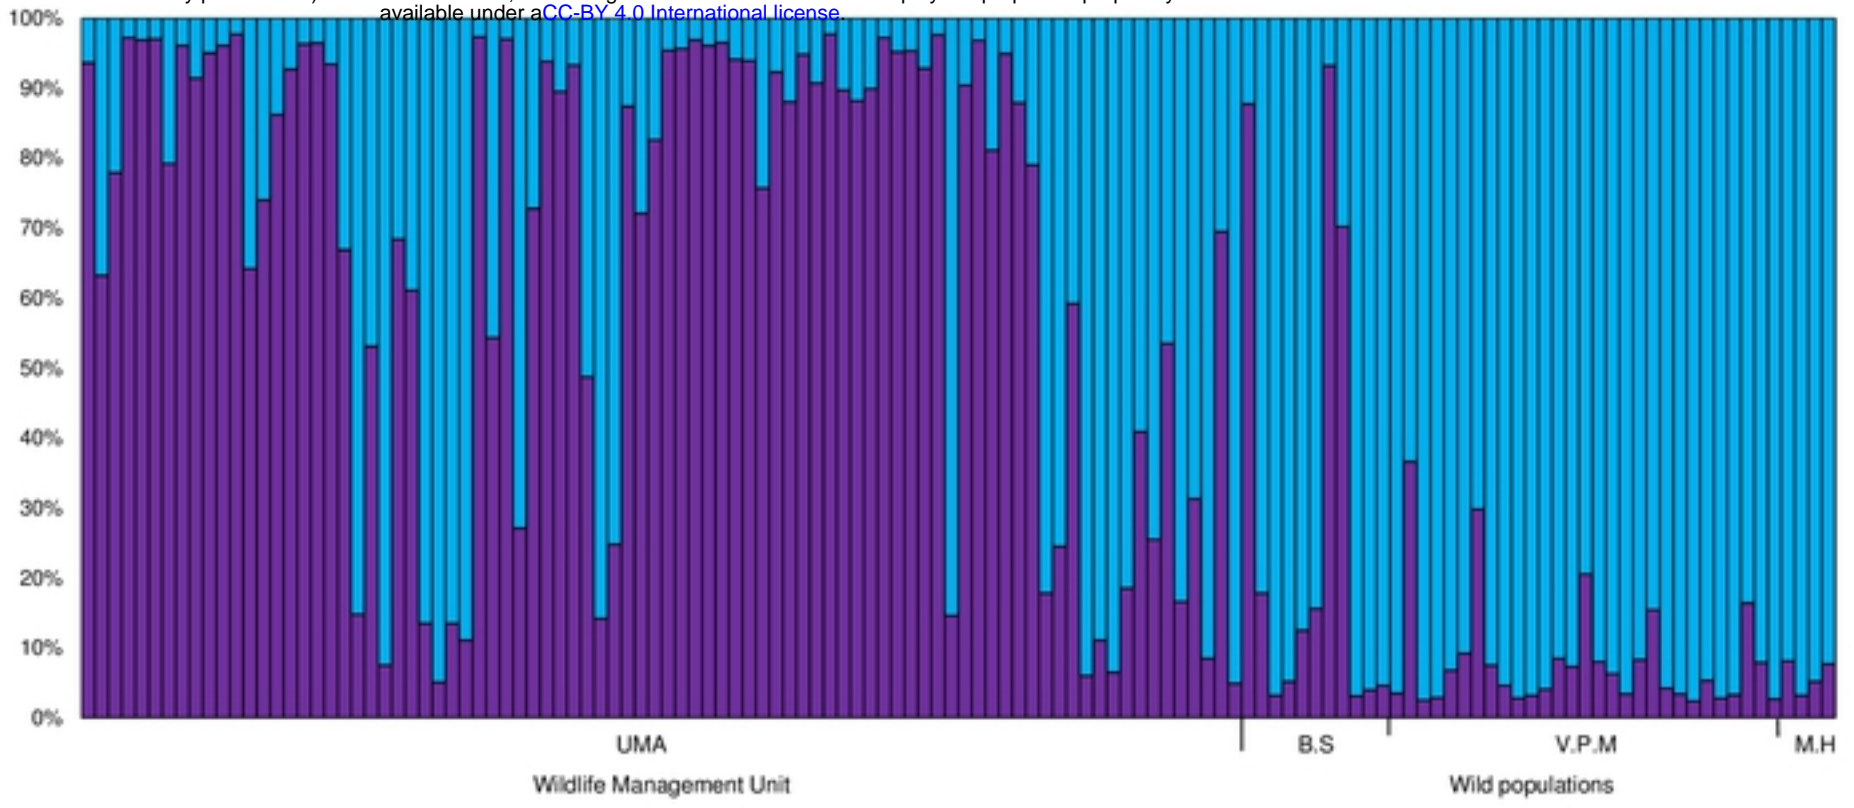



bioRxiv preprint doi: <https://doi.org/10.1101/2020.01.27.920983>; this version posted January 28, 2020. The copyright holder for this preprint (which was not certified by peer review) is the author/funder, who has granted bioRxiv a license to display the preprint in perpetuity. It is made available under aCC-BY 4.0 International license.

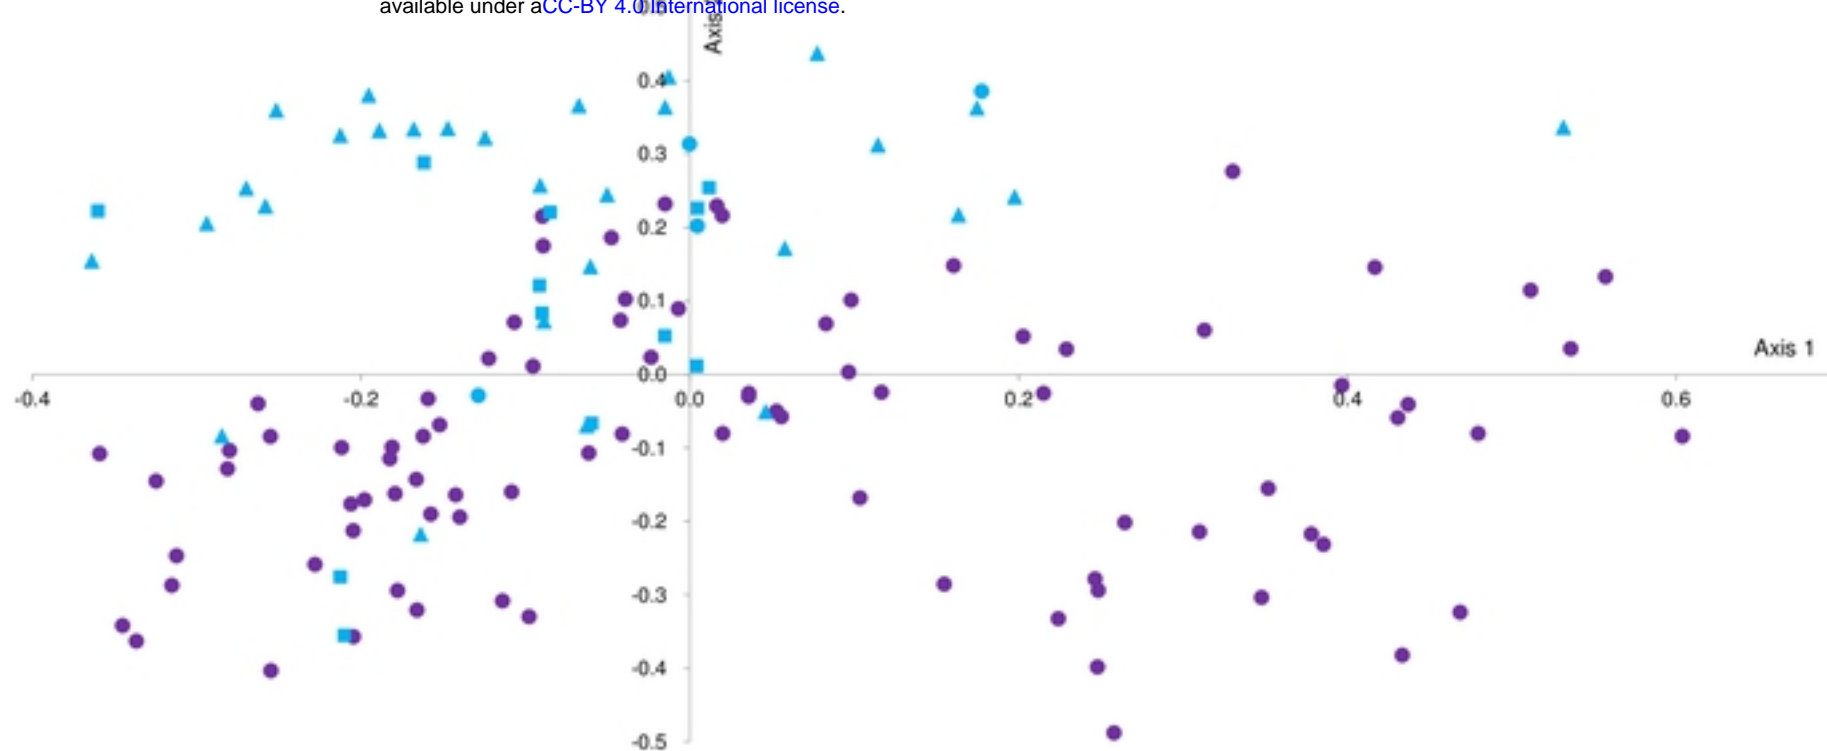

## Principal coordinate analysis (PCoA)

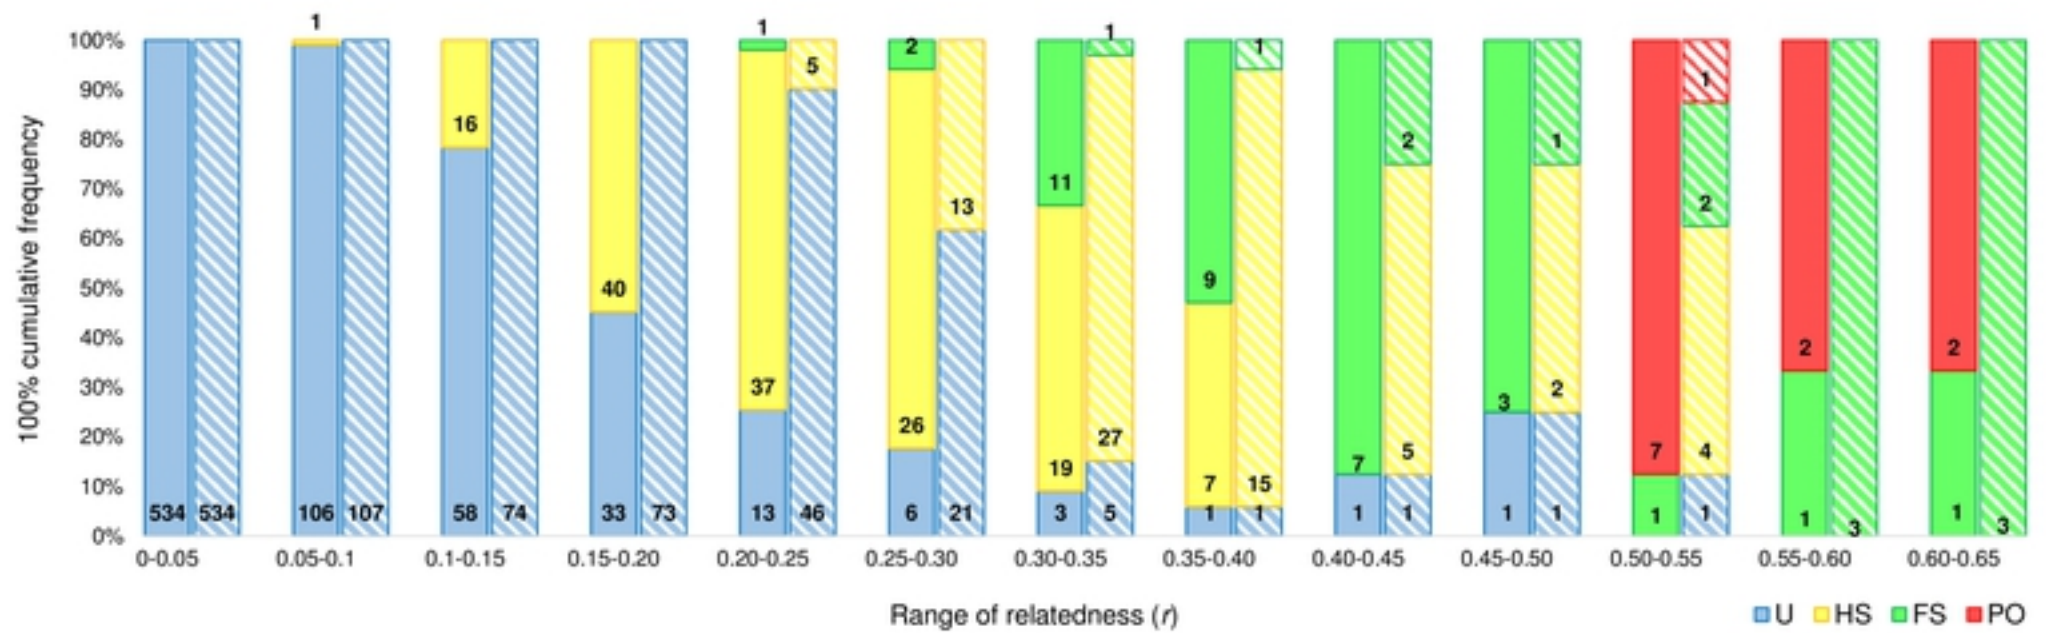

Distribution of cumulative frequencies of relatedness coefficient
